# Supplementary material
Source: ML conference proceedings conference paper supplement (https://openreview.net/forum?id=ZcMeHsJg3c)
Supplement: supplementary_material [file attachment]

## Sheet: ExpertLevel1_Geography
file	country	1.1.1.Geography-Country	Resolve_EL1	Additions	Ommissions	Missing data in the Human coded set
6205524	Tanzania	Tanzania	1
6205525	Ghana, Burkina Faso	Ghana	0	1
6205526	Malawi, Mozambique, Zambia, Zimbabwe	Malawi|||Mozambique|||Zambia|||Zimbabwe|||Malawi, Mozambique, Zambia and Zimbabwe	1
6205528	Malawi	Malawi|||Southern Malawi	1
6216010	Malawi	Malawi|||Central Malawi (Kasungu and Lilongwe) and four districts in Southern Malawi (Chiradzulu, Machinga, Thyolo and Zomba)	1
6216012	Uganda	Uganda	1
6216013	Germany	Germany	1
6216014	Kenya	Kenya	1
6216015	Ethiopia	Ethiopia	1
6216017	Nigeria	Nigeria	1
6216019	South Africa	South Africa	1
6216022	Somalia	Somalia	1
6216024	Malawi	Malawi	1
6216026	Uganda	Uganda	1
6216028	China	China	1
6216030	Tunisia	Tunisia	1
6714220	Kenya	Kenya	1
6714222	Ghana	Ghana	1
6714223	USA	USA|||New York and Wisconsin, USA	1
6714224	Malawi	Malawi	1
6714225	Ethiopia	Ethiopia|||Northeastern Amhara, Ethiopia	1
6714226	Bangladesh	Kalapara sub-district of Patuakhali district of Bangladesh|||Bangladesh	1
6714227	Nepal	Tanahun district of Nepal|||Nepal	1
6714228	India	India	1
6714232	India	India	1
6714233	Malawi, Mozambique, South Africa, Zambia, Zimbabwe	five southern African countries (Malawi, Mozambique, South Africa, Zambia and Zimbabwe)|||Malawi, Mozambique, South Africa, Zambia, Zimbabwe|||Malawi, Mozambique, South Africa, Zambia and Zimbabwe|||Malawi|||Mozambique|||South Africa|||Zambia|||Zimbabwe	1
6714234	Ghana	Ghana|||Talensi District|||Ghanan	1
6714235	Canada, Argentina, Brazil, Chile, Colombia	Canada	0	1
6714238	India, Nepal, Bhutan	Sikkim Himalayas,India|||India	0	1
6714593	Nigeria	Nigeria	1
6714594	Malawi	Malawi	1
6714596	Ethiopia, Senegal, Democratic Republic of Congo (D.R. Congo), Multiple African countries		0			1
6714598	Kenya, Ethiopia	Kenya and Ethiopia	1
6714599	Canada	Canada|||Pangnirtung, Canada	1
6714600	Vietnam	Vietnam|||central region of Vietnam	1
6714601	Tanzania	Tanzania	1
6714602	India	India	1
6714603	China	China	1
6714604	Tanzania	Tanzania	1
6714606	Bangladesh, China, Thailand, India, Vietnam, Iran, Pakistan	Bangladesh|||China|||India|||Iran|||Vietnam|||Thailand|||Pakistan|||Nepal|||Sri Lanka|||Malaysia|||Philippines|||Oman	0		1
6714607	Rwanda	Rwanda	1
6714611	Zimbabwe	Zimbabwe	1
6714612	Tanzania	Tanzania	1
6714613	Nigeria	Nigeria|||Southwestern Nigeria	1
6714614	Colombia	Colombia	1
6714615	Ghana	Ghana	1
6714616	Japan	Japan	1
6714617	Sierra Leone	Sierra Leone|||Kambia and Kono Districts of Sierra Leone	1
6714618	Pakistan	Pakistan	1
6714620	Indonesia	Indonesia	1
6714621	Ethiopia	Ethiopia	1
6714622	Benin	West Africa|||Benin	1
6714623	Nigeria	Nigeria	1
6714626	Burkina Faso, Ghana, Mali, Niger, Senegal	Senegal|||Ghana|||Burkina Faso|||Niger|||Mali	1
6714627	India	India|||Andhra Pradesh, India	1
6714628	Ethiopia	Ethiopia	1
6714629	Zimbabwe	Zimbabwe	1
6714630	United States	United States	1
6714632	Burkina Faso	Burkina Faso	1
6714635	India	India|||Rajasthan	1
6714636	India	India	1
6714637	Iran	Iran	1
6714638	Ethiopia	Ethiopia	1
6714639	Lebanon	Lebanon	1
6714640	Pakistan	Pakistan	1
6714642	Ghana	Ghana	1
6714643	Indonesia	Indonesia	1
6714644	Germany, Lebanon	Germany and Lebanon|||Brandenburg, Germany and semi-arid Bekaa, Lebanon	1
6714646	India	India	1
6714647	Indonesia	Indonesia	1
6714650	Kenya	Kenya|||western Kenya	1
6714652	India	Krishna River Basin, India|||India (Krishna River Basin)	1
6714653	Tunisia	Tuniasia|||Tunisia	1
6714654	Nepal	Nepal|||Thulokhola watershed is located in the Nuwakot district of Nepal	1
6714655	Ethiopia	Ethiopia	1
6714703	United States	United States|||United States of America	1
6714704	India	India	1
6714705	Brazil	Brazil	1
6714707	Pakistan	Pakistan	1
6714709	France	Guadeloupe|||Guadeloupe (Small* Island State?)	0			1
6714811	Bangladesh	Bangladesh	1
6714813	Nepal	Nepal	1
6714817	Nigeria, Ethiopia	Nigeria and Ethiopia	1
6714819	Italy	Italy Emilia-Romana Region|||Italy	1
6714820	Spain, Portugal, Greece, Turkey, Morocco, Algeria	We focus on the Mediterranean ecoregion, which delineates the area with a typical Mediterranean climate and biogeographic conditions (Olson et al. 2001). The area is spread over 25 countries surrounding the Mediterranean sea	0			1
6714571	China	China	1
6714573	Kenya	Kenya	1
6714574	Viet Nam	Viet Nam|||Vietnam	1
6714575	Mozambique, Ghana, Kenya	Multiple areas|||Multiple countries	0			1
6714577	Kenya	Kenya	1
6714578	Ethiopia	Ethiopia|||Ethiopia-- Afar and Oromia regions	1
6714579	India	India	1
6714580	Niger, Kenya, Tanzania, Uganda, Zimbabwe	11 case studies across 9 countries (Burkina Faso, Ghana, Mali, Niger, Senegal, Ethiopia, Kenya, Tanzania, and Uganda)|||Burkina Faso, Ghana, Mali, Niger, Senegal, Ethiopia, Kenya, Tanzania, and Uganda	0	1	1
6714581	Vietnam	Vietnam	1
6714582	Nepal	Nepal	1
6714585	Niger	Niger	1
6714586	Zimbabwe	Zimbabwe|||Zimbawe	1
6714587	Ghana	Ghana	1
6714588	China	China	1
6714590	Ethiopia	Ethiopia|||Yabello district of Borana Zone, southern Ethiopia.	1
6714592	Oman	Oman|||Sultanate of Oman	1
7851117	Vietnam	Vietnam	1
7851118	Bolivia	Bolivia	1
7851127	South Africa, Cameroon, Zimbabwe, Nigeria, Peru	South Africa	1	1
7851128	India	India|||Haryana	1
7851132	Turkey	Turkey	1
7851134	Mexico	Mexico	1
7851142	India	India	1
7851155	Bangladesh	Bangladesh	1
7851158	Republic of Benin	Benin	1
7851161	Tanzania	Tanzania	1
7851163	Uganda	Uganda	1
7851165	Nepal, India	Nepal|||Nepal, India	1
7851166	Nigeria	Niger Delta|||Nigeria	1
7851169	Europe		0			1
6714240	Belgium	Belgium	1
6714241	Nigeria	Nigeria	1
6714242	Thailand	Thailand	1
6714243	Viet Nam	Vietnam	1
6714245	Ethiopia	Ethiopia	1
6714246	China	China|||"nine provinces include Hebei, Henan, Shandong, Jilin, and Anhui in northern China and Jiangxi, Guangdong, Yunnan, and Jiangsu in southern China"	1
6714247	Portugal	Portgual|||Portugal	1
6714248	Niger, Togo, Burkina Faso	Senegal, Burkina Faso, Ivory Coast|||Ivory Coast, Senegal, Burkina Faso	0	1	1
6714249	Tanzania	Tanzania	1
6714250	Nepal, India, Bangladesh	7 sites from India, 4 from Nepal and 4 from coastal Bangladesh|||India|||Nepal|||Bangladesh	1
6714251	Germany	Germany	1
6714252	Niger	Niger|||Aguie district in Niger	1
6714253	Bhutan	Bhutan	1
6714254	China	China	1
6714255	Botswana	Botswana	1
6714256	Mexico	Mexico	1
6714259	Bolivia	Bolivia	1
6714260	Ghana	Ghana	1
6714261	Pakistan	Pakistan	1
6714263	Nepal	Nepal	1
6714264	Canada	Canada	1
6714267	Spain	Spain	1
6714268	Madagascar	Madagascar	1
6714269	China	China|||The survey was carried out in the provinces of Hebei, Henan, and Ningxia	1
6714605	El Salvador, Guatemala, Honduras, Nicaragua	El Salvador|||Guatemala|||Honduras|||Nicaragua	1
6714641	Zimbabwe	Zimbabwe|||Chilonga Ward	1
6714657	China	Nagqu County, a remote area of northern Tibet|||Tibet, China	1
6714658	United States	Puerto Rico	0			1
6714659	Nigeria	Nigeria|||Ondo State, Nigeria	1
6714660	Mali	Mali	1
6714661	Malawi, Zimbabwe	Malawi|||Zimbabwe|||Malawi & Zimbabwe	1
6714664	Bangladesh	Bangladesh	1
6714665	India	India	1
6714666	Nicaragua, El Salvador, Mexico, Guatemala, Panama		0			1
6714667	Zimbabwe	Zimbabwe|||Four districts: s in four districts of Zimbabwe: Goromonzi, Mudzi, Hwedza and Guruve	1
6714670	China	China|||Henan province	1
6714671	Russia	Siberia|||Russia	1
6714673	Bangladesh, Burkina Faso, Ethiopia, Ghana, India, Kenya, Mali, Nepal, Niger, Senegal, Tanzania, Uganda	angladesh, Burkina Faso, Ethiopia, Ghana, India, Kenya, Mali, Nepal, Niger, Senegal, Tanzania, and Uganda	1
6714674	China	China (Southern China)|||China	1
6714677	India	Karnataka, India|||India	1
6714679	Sri Lanka	Sri Lanka	1
6714680	China	China	1
6714682	Costa Rica	Costa Rica	1
6714683	United States	USA|||North Carolina|||United States, North Carolina	1
6714684	Philippines	Philippines	1
6714686	Ghana	Ghana	1
6714687	Ghana	Ghana	1
6714688	Ghana	Ghana|||Upper East Region of Ghana	1
6714689	Nepal	Nepal	1
6714690	Nepal	Nepal	1
6714692	Kenya	Kenya	1
6714695	Kenya	Kenya	1
6714696	United States	United States|||Montana	1
6714697	Pakistan	Pakistan	1
6714698	Tanzania	Tanzania|||Iringa region (Tanzania)	1
6714699	Egypt, Nigeria	Egypt|||Nigeria|||Nigeria and Egypt	1
6714701	Australia	Australia	1
6714702	Burkina Faso	Burkina Faso	1
6216006	Senegal, Kenya	Kenya, Senegal	1
6714270	Sri Lanka	Sri Lanka	1
6714271	Kenya	Kenya	1
6714272	China	China	1
6714273	Peru	Peru	1
6714274	Pakistan	Pakistan	1
6714275	Peru	Peru|||Central Andes|||PeruÃƒÂ¢Ã¢â€šÂ¬Ã¢â‚¬Å“ Department of Huancavelica	1
6714276	Nepal	Nepal	1
6714277	China	China	1
6714278	India	India	1
6714279	Australia	Australia	1
6714281	South Africa	South Africa	1
6714283	Zambia	Zambia|||sub-Saharan Africa	1
6714284	Guatemala	Guatemala	1
6714285	Bhutan	Bhutan	1
6714287	Uganda	Uganda	1
6714288	Myanmar	Myanmar	1
6714289	Ecuador	Ecuador	1
6714290	Burkina Faso	Burkina Faso	1
6714291	Canada	Canada	1
6714292	Algeria	Setif region (Algeria)|||the region of Setif, situated in the Eastern part of Algeria|||Algeria	1
6714293	China	China|||Hulun Buir, CHINA	1
6714294	Ghana	Ghana	1
6714295	China	China	1
6714296	Ethiopia, Kenya, Uganda, Tanzania	Ethiopia, Kenya, Uganda and Tanzania.|||Ethiopia|||Kenya|||Uganda|||Tanzania|||Borana, Ethiopia|||Nyando, Kenya|||Hoima, Uganda|||Lushoto, Tanzania|||Ethiopia, Kenya, Uganda, and Tanzania	1
6714706	Tanzania, Kenya, Uganda	Tanzania|||Kenya|||Uganda|||"This paper shows how the World Vegetable Center (WorldVeg) from 2013 to 2017 to smallholder farmers in Tanzania, Kenya and Uganda"	1
6714711	United States	Vermont, United States|||USA|||Vermont	1
6714712	Peru	Peru	1
6714713	Pakistan	Pakistan	1
6714714	Burkina Faso	Burkina Fase|||Burkina Faso	1
6714716	Nigeria	Nigeria	1
6714718	United States	United States of America|||United States	1
6714720	Vietnam	Vietnam|||Mekong Delta, VIETNAM	1
6714721	Bangladesh	Bangladesh	1
6714722	Costa Rica	Costa Rica	1
6714723	China	China	1
6714724	Philippines	Philippines	1
6714727	Austria	Austria	1
6714728	Ethiopia	Semien Shewa Zone in Ethiopia|||Semien Shewa Zone of Ethiopia	1
6714731	Tanzania	Tanzania	1
6714732	Kenya	Kenya	1
6714733	Pakistan	Pakistan	1
6714734	India	India|||Karnataka|||Karnataka state	1
6714736	Bangladesh, Bhutan, Nepal, India	Bangladesh, Bhutan, India Nepa|||Bangladesh|||Bhutan|||Nepal|||India	1
6714737	Brazil	Brazil|||Brazil - northeast region	1
6714738	Cambodia, Laos, Myanmar, Thailand, Vietnam	Indochinese peninsula regions	0			1
6714739	Zimbabwe	Zimbabwe|||Southern Africa|||Southern Africa, Zimbabwe	1
6714740	Uganda	Uganda|||Western Uganda	1
6714744	Cameroon	Cameroon|||Rural Cameroon	1
6714746	India	India|||Odisha, India	1
6714747	India	India	1
6714749	Bangladesh	Bangladesh	1
6714752	United States	United States|||U.S.A	1
6714756	Bangladesh	Bangladesh	1
6714757	Mali	Mali	1
6714758	India	India	1
6714760	Sri Lanka	Udawalawe, Sri Lanka|||Sri Lanka	1
6714761	Senegal	The Sahel|||Senegal	1
6714763	Pakistan	Pakistan|||rural Punjab, Pakistan	1
6714764	Bangladesh	Bangladesh	1
6714767	China	Loess Plateau region (LPR) is located in the North China|||China	1
6714769	Vietnam, Kenya	Vietnam|||Kenya	1
6714771	Ethiopia	Ethiopia|||Semiarid Highlands of Eastern Tigray, Northern Ethiopia	1
6714297	Pakistan	Balambat Tehsil, District Dir Lower, Pakistan|||Pakistan	1
6714298	Nepal	Nepal	1
6714299	Uganda	Uganda	1
6714300	Malawi	Malawi	1
6714301	Viet Nam	Vietnam|||Viet Nam	1
6714302	China	China	1
6714303	China	China	1
6714304	Tanzania	Tanzania|||Northeast Tanzania	1
6714305	Pakistan	Pakistan	1
6714307	Zambia, Mozambique, Malawi	Malawi|||Zambia|||Mozambique|||Chinyanja Triangel: Mozambiqu, Malawi, and Zambia	1
6714309	Zimbabwe, Mozambique, Malawi	Zimbabwe|||Mozambique|||Malawi|||Zimbabwe, Mozambique and Malawi	1
6714310	Vietnam	Vietnam	1
6714311	India	India	1
6714312	Afghanistan	Afghanistan	1
6714313	Indonesia	Indonesia	1
6714314	Ethiopia	Ethiopia	1
6714315	Bangladesh	Bangladesh	1
6714316	Bangladesh	Bangladesh|||Northwest Region	1
6714317	Nigeria	Nigeria|||Nigeria, Imo State|||Iran	1
6714318	Vietnam	Vietnam	1
6714319	Nepal	Nepal|||Nepal: Mustang District	1
6714320	Indonesia, Timor Leste	Indonesia|||Timor Leste|||Indonesia, Timor Leste|||Indonesia and timor leste|||Indonasia and Timor Leste	1
6714321	Ethiopia	Addis Ababa, Ethiopia|||Ethiopia	1
6714322	USA	Maple Syrup Producers Associations (MSPAs) in Minnesota, Wisconsin, and Michigan.|||Minnesota|||Wisconsin|||Michigan|||United States	1
6714323	Kenya	Kenya	1
6714324	Mexico	Mexico	1
6714325	Kenya	West Pokot, Kenya|||Kenya	1
6714327	Kenya	Kenya	1
6714609	Bangladesh	Bangladesh	1
6714743	Nepal	Nepal|||NepaÃƒÆ’Ã‚Â±	1
6714748	India	Chilika Lagoon, India|||India	1
6714755	Not specified	Guatemala	0
6714774	Ethiopia	Ethopia|||Ethiopia	1
6714775	Tanzania	Tanzania	1
6714776	Malaysia	Malaysia	1
6714777	Zambia, Kenya, Malawi, Nigeria, Ghana, Zimbabwe	sub-saharan Africa	0			1
6714778	Bangladesh	Bangladesh	1
6714779	Vietnam	Vietnam	1
6714781	Malawi	Malawi	1
6714782	Tanzania	Zanzibar, Tanzania|||Tanzania	1
6714783	Nepal	Panchase Mountain Ecological Region of western Nepal|||Nepal	1
6714785	USA	US|||Wyoming	1
6714786	Costa Rica	Costa Rica|||Northwest Costa Rica	1
6714787	India	India	1
6714789	India	India	1
6714790	Kenya	Kenya	1
6714791	Kenya	Kenya	1
6714792	Bangladesh	Bangladesh|||Bangladesh,	1
6714793	Nepal, India, Bangladesh	India|||Nepal|||Bangladesh	1
6714796	India	India	1
6714797	Nepal	Nepal	1
6714800	Ethiopia	Ethiopia	1
6714801	Nepal	Nepal	1
6714802	Pakistan	Pakistan	1
6714804	Bangladesh	Bangladesh	1
6714805	Nepal	Nepal	1
6714806	CÃ´te d'Ivoire	Cote d'Ivoire|||Cote d'Ivoire	1
6714807	Tanzania, Madagascar	East and Southern Africa	0			1
6714808	CÃ´te dâ€™Ivoire	Cote d'Ivoire	1
6714809	Nigeria	Osun State, Nigeria|||Nigeria	1
6714810	USA	US|||United States, California	1
6714329	Ghana	Ghana	1
6714330	Kenya	Kenya	1
6714331	Mongolia, China	Mongolia|||China|||Mongolia and Inner Mongolia, China	1
6714332	Ghana	Ghana	1
6714334	India	India	1
6714336	India	India	1
6714337	CÃ´te dâ€™Ivoire	cote d'ivoire|||the ivory coast|||Cte d'Ivoire	1
6714338	India	India	1
6714340	Ethiopia	Dabus watershed is part of the Blue Nile River basin and is situated in the North-West Ethiopia|||Ethiopia|||Dabus watershed, North-West Ethiopia|||East Africa	1
6714341	Indonesia	Indonesia|||Lampung, Indonesia	1
6714342	Pakistan	Pakistan	1
6714344	Vietnam	Vietnam	1
6714346	Australia	Australia	1
6714347	Zimbabwe	Zimbabwe	1
6714348	Chile	Chile	1
6714352	Nigeria	Nigeria	1
6714353	Pakistan	Pakistan|||Phillipines	0			1
6714354	Ethiopia	Ethiopia	1
6714355	USA	USA	1
6714357	China	China	1
6714816	Mozambique	Mozambique|||coastal Mozambique	1
6714822	United States	Northwest Atlantic: USA|||United States	1
6714823	Uganda	Uganda	1
6714824	Denmark	Denmark	1
6714825	Zambia	Zambia	1
6714826	Iran	Iran	1
6714828	Nepal	Nepal	1
6714829	Mexico	Mexico	1
6714830	France	western France|||Western France	1
6714831	Kenya, Tunisia, India	Afghanistan|||Kenya|||Ethiopia|||Germany|||Ghana|||India|||Papua New Guinea|||Philippines|||Switzerland|||Tanzania|||Tunisia|||United Kingdom|||United States of America|||Global|||Initiatives were concentrated in the global south, particularly south Asia, and east/west Africa. India and Kenya were highlighted as individual countries with the highest numbers of initiatives reviewed.	0	1	1
6714832	Italy	Italy	1
6714836	Canada	Canada	1
6714837	Pakistan, India, Nepal, China	India, Pakistan, Buthan, China and Nepal mainly|||Upper Indus (Pakistan), Eastern Brahmaputra (India), Koshi (Nepal) and Salween and Mekong (China).	0		1
6714838	Mexico	Mexico	1
6714839	India	India	1
6714841	India	India	1
6714842	Bhutan	Bhutan	1
6714843	Ethiopia	Ethiopia	1
6714844	Ethiopia	Ethiopia	1
6714848	Australia	Australia	1
6714850	South Africa	South Africa	1
6714851	Tanzania	Arumeru District, Tanzania|||villages of Arumeru district in Northern Tanzania	1
6714854	Ethiopia	Ethiopia|||the Nile River Basin in Ethiopia	1
6714855	Colombia	Colombia	1
6715346	Lao PDR, Philippines	Lao PDR, Philippines|||Lao PDR, Philippines.	1
6715347	Bangladesh	Bangladesh	1
6715349	Myanmar	Myanmar	1
6715350	Ethiopia	Ethiopia	1
7851049	Cameroon	Cameroon	1
7851053	United States	USA, New England|||United States of America	1
7851057	South Africa, Mozambique, Zambia, Malawi	South Africa, Malawi, Zambia, Mozambique|||South Africa|||southern Africa|||Southern Africa|||Mozambique|||Malawi|||Zambia	1
7851058	Japan	Japan	1
7851061	Peru	Peru	1
7851062	Sweden	Sweden	1
7851065	Afghanistan, Bangladesh, India, Nepal, Pakistan	five different countries	0			1
7851066	Sri Lanka	Sri Lanka	1
6714345	Bangladesh	Bangladesh	1
6714360	India	India	1
6714361	Rwanda, Malawi, Nigeria (Sudano-Sahelian areas), South Africa, Mauritius, Seychelles, Uganda, Lesotho, Zambia, Gambia, Guinea-Bissau, Namibia	Botswana|||Egypt|||Uganda|||Eritrea|||Sudan|||Gambia,|||Rwanda|||Ghana|||Malawi|||Guinea-Bissau|||Kenya|||Lesotho|||Mauritius|||Namibia|||Nigeria|||Sierra Leone|||South Africa|||Swaziland|||Seychelles|||Zambia|||Zimbabwe|||21 African countries	0		1
6714362	South Africa	Eastern Cape, South Africa|||South Africa	1
6714363	Sweden, Finland	Sweden and Finland|||Finland and Sweden	1
6714366	India	India|||cold desert of leh in North-West Himalaya, India	1
6714368	Ghana	Ghana|||Offinso North District, GHANA	1
6714370	Australia	Australia|||Corangamite Shire, Victoria	1
6714371	Nigeria	Nigeria|||Enugu State (Nigeria)|||Enugu State, Nigeria	1
6714372	Bangladesh	Bangladesh	1
6714373	Pakistan	Pakistan	1
6714374	Mexico	Mexico	1
6714375	Bangladesh	Bangladesh|||Rajshahi district	1
6714376	India	India	1
6714377	Kenya	Kenya|||semiarid Kenya	1
6714378	USA	Midwest, USA|||United States	1
6714379	China	China	1
6714380	China	China	1
6714384	Iran	Iran|||Fars province|||Fars Province of Iran	1
6714385	Ghana	Ghana	1
6714386	Japan, South Africa	Japan|||South Africa|||South Africa, Japan	1
6714387	Brazil	Brazil|||Brasil	1
6714388	Nepal	Nepal	1
6714389	Mexico, Peru, Argentina, Costa Rica, El Salvador, Guatemala, Nicaragua, Paraguay, Ecuador, Bolivia, Venezuela	Costa Rica|||El Salvador|||Guatemala|||Nicaragua|||Paraguay|||Ecuador|||Mexico|||Peru|||Argentina|||Bolivia|||Venezuela|||(1) Dry sub-humid region of the Pacific in Central America (Costa Rica, El Salvador, Guatemala, Nicaragua) and the Chaco (Paraguay); (2) Warm semi-arid region (Loja, Ecuador); (3) Temperate arid region (Zacatecas, Mexico; Piura, Peru; Mendoza, Argentina); (4) Cold arid region …	1
6714390	China	China - Gannan Plateau	1
6714391	India	India|||Bihar and Haryana in the Indo-Gangetic Plains	1
6714392	Pakistan	Pakistan	1
6714393	India	India	1
6714394	Australia	Australia, note for 1.3: Mediterranean growing region, not geography|||Australia	1
6714397	United States of America	USA|||Oregon|||Oregon, United States	1
6714398	Nepal	Nepal	1
6714399	Thailand	Thailand|||Suphanburi Province, Thailand	1
6714400	Namibia	Namibia|||Onesi constituency in Omusati region (Namibia)	1
6714401	India	India|||India's Telangana State	1
6714402	Bangladesh	Bangladesh	1
6714403	Uganda	Uganda|||East Africa	1
6714404	Guatemala	Guatemala	1
6714405	Kenya, Ethiopia, Colombia		0			1
6714406	Pakistan	Pakistan	1
6714408	Ethiopia	Ethiopia|||Oromia in Ethiopia	1
7851073	United States	USA, specifically Louisiana, Mississippi and Arkansas|||United States|||Louisiana, Mississippi, Arkansas	1
7851074	Benin	Benin	1
7851075	USA	USA|||United States	1
7851076	Vietnam	Central Vietnam|||Vietnam	1
7851080	China	China	1
7851081	Indonesia	Indonesia|||Kampung Tambak Lorok Semarang	1
7851083	Bangladesh, Indonesia, Sri Lanka, Thailand, Vietnam	Bangladesh, Indonesia, Sri Lanka, Thailand, Viet Nam|||Bangladesh|||Indonesia|||Sri Lanka|||Thailand|||Vietnam	1
7851084	Afghanistan	Herat, AFGHANISTAN|||Afghanistan	1
7851085	India	India	1
7851088	United States	New York,USA|||United States|||New York	1
7851090	Kenya, Madagascar, Ghana, Mali, Mozambique, Tanzania, Uganda, Zambia, Zimbabwe, Benin, Morocco, Malawi	Kenya, Tanzania, Uganda, Benin, Morocco, Madagascar, Ghana, Mali, Mozambique, Zambia, Zimbabwe, Malawi|||Kenya, Tanzania and Uganda|||Analanjirofo region of Madagascar|||Ghana, Mali, Mozambique, Tanzania, Uganda, Zambia and Zimbabwe|||Benin|||Lamzoudia (Morocco)|||Malawi|||Ghana, Mali, Mozambique, Tanzania, Uganda, Zambia and Zimbabwe.	1
7851091	Guatemala	Guatemala	1
7851092	Bangladesh	Bangladesh	1
7851094	Thailand	Thailand	1
7851098	India	India	1
7851099	Ghana	Ghana	1
7851102	Myanmar	Myanmar	1
7851103	Ecuador, Peru	Ecuador	0	1
7851104	Zambia, Kenya, Malawi, Nigeria, Ghana, Zimbabwe	Sweden	0		1
7851105	China	China|||Mongolia Autonomous Region	1
7851107	Ghana	Ghana	1
7851109	United States	USA|||United States|||The ERS special cross-tabs report data for the 17 western contiguous states (North Dakota, South Dakota, Nebraska, Kansas, Oklahoma, Texas, Montana, Wyoming, Colorado, New Mexico, Idaho, Utah, Arizona, Nevada, Washington, Oregon, and California)	1
7851112	Peru	Peru	1
7851115	Philippines	Philippines	1
6714409	Belgium	Belgium	1
6714411	Nepal	Nepal|||NEPAL	1
6714412	Kenya	Kenya|||Tharaka South Sub-county (Kenya)	1
6714413	Pakistan	Pakistan|||Ghana	0		1
6714414	Ghana	Ghana - 2 municipalities|||Ghana|||West Africa	1
6714415	Ethiopia	Ethiopia|||East Africa	1
6714417	India	India	1
6714418	Sri Lanka	Sri Lanka	1
6714420	Nigeria	Nigeria	1
6714421	Nigeria	Nigeria	1
6714422	Nepal	Nepal	1
6714423	Sweden, Finland	Sweden, Finland|||Sweden|||Finland|||Sweden and Finland	1
6714424	Nigeria	Nigeria|||Enugu and Ebonyi States of Southeast (Nigeria)	1
6714425	United States	United States|||USA	1
6714426	Thailand	Thailand	1
6714427	Mexico	Mexico|||state of Veracruz	1
6714428	India	India	1
6714429	China	China|||Yongqiao Distrist	1
6714432	Nigeria	Nigeria|||Enugu State|||Enugu State, Nigeria	1
6714433	Bangladesh	Bangladesh	1
6714434	Nigeria	Nigeria|||Southeast Nigeria	1
6714435	Nigeria	Nigeria	1
6714436	China	China|||Northeast Farming Region of China (NFR)	1
6714439	Guatemala	Guatemala	1
6714443	Not specified	The Gambia|||Gambia	0		1
6714445	Ghana	Ghana|||northern region of Ghana|||West Africa	1
6714447	Cameroon	Cameroon|||West Africa	1
6714448	Kenya	Burkina Faso|||Kenya|||Teso North Sub-county, Busia County in Kenya	0		1
6714449	China	China|||Loess Plateau Region of China|||Loess Plateau Region of China: Mizhi and Yangling in Shaanxi, Hongsipu (a county-level municipality) in Ningxia, and Ganzhou and Gaotai in Gansu	1
6714451	Bolivia	Bolivia|||Bolivian Altiplano	1
6714529	China	China|||Tibet	1
6714531	Pakistan	Pakistan	1
6714533	Kenya	Kenya|||Kenyan|||Laikipia region of Kenya.	1
6714536	Benin	Benin Republic	1
6714537	India	India|||Nepal	1
6714539	Bolivia, Kenya	Kenya|||Bolivia|||Bolivia, Kenya	1
6714540	Thailand	Thailand	1
6714541	China	China	1
6714542	Nicaragua	Nicaragua	1
6714544	Ethiopia	Ethiopia	1
6714545	Zambia, Zimbabwe, Ghana, South Africa	Zambia	0	1
6714546	China	China	1
6714549	Sweden	sweden|||Sweden	1
6714551	Pakistan	Pakistan	1
6714553	Philippines	Philippines|||Mindanao, Philippines	1
6714554	Viet Nam	Vietnam|||Viet Nam-Mekong River Delta	1
6714555	South Africa	South Africa	1
6714556	India	Haryana, India|||India	1
6714557	Tanzania	Tanzania	1
6714558	Ethiopia	Ethiopia	1
6714559	Zimbabwe	Zimbabwe	1
6714561	Malawi	Malawi|||Southern Malawi	1
6714564	Benin, Botswana, Ethiopia, Kenya, Ghana, Zimbabwe	"Sub-Saharan drylands"|||Benin|||Botswana|||Burkina Faso|||Chad|||Ethiopia|||Gambia|||Ghana|||Kenya|||Mali|||Namibia|||Niger|||Nigeria|||Senegal|||South Africa|||Tanzania|||Zimbabwe	0		1
6714565	Ethiopia	Ethiopia	1
7851139	Sudan	Sudan	1
7851141	Ghana	Ghana	1
7851149	India	India	1
7851150	USA	USA	1
7851151	Canada	Canada	1
7851153	Malawi	Malawi	1
7851156	South Africa	South Africa	1
7851157	Afghanistan, Bhutan, China, India, Nepal, Pakistan		0			1
6714409	Belgium	Belgium	1
6714411	Nepal	Nepal|||NEPAL	1
6714412	Kenya	Kenya|||Tharaka South Sub-county (Kenya)	1
6714413	Pakistan	Pakistan|||Ghana	0		1
6714414	Ghana	Ghana - 2 municipalities|||Ghana|||West Africa	1
6714415	Ethiopia	Ethiopia|||East Africa	1
6714417	India	India	1
6714418	Sri Lanka	Sri Lanka	1
6714420	Nigeria	Nigeria	1
6714421	Nigeria	Nigeria	1
6714422	Nepal	Nepal	1
6714423	Sweden, Finland	Sweden, Finland|||Sweden|||Finland|||Sweden and Finland	1
6714424	Nigeria	Nigeria|||Enugu and Ebonyi States of Southeast (Nigeria)	1
6714425	USA	United States|||USA	1
6714426	Thailand	Thailand	1
6714427	Mexico	Mexico|||state of Veracruz	1
6714428	India	India	1
6714429	China	China|||Yongqiao Distrist	1
6714432	Nigeria	Nigeria|||Enugu State|||Enugu State, Nigeria	1
6714433	Bangladesh	Bangladesh	1
6714434	Nigeria	Nigeria|||Southeast Nigeria	1
6714435	Nigeria	Nigeria	1
6714436	China	China|||Northeast Farming Region of China (NFR)	1
6714439	Guatemala	Guatemala	1
6714443	Not provided	The Gambia|||Gambia	0		1
6714445	Ghana	Ghana|||northern region of Ghana|||West Africa	1
6714447	Cameroon	Cameroon|||West Africa	1
6714448	Kenya	Burkina Faso|||Kenya|||Teso North Sub-county, Busia County in Kenya	0		1
6714449	China	China|||Loess Plateau Region of China|||Loess Plateau Region of China: Mizhi and Yangling in Shaanxi, Hongsipu (a county-level municipality) in Ningxia, and Ganzhou and Gaotai in Gansu	1
6714451	Bolivia	Bolivia|||Bolivian Altiplano	1
6714529	China	China|||Tibet	1
6714531	Pakistan	Pakistan	1
6714533	Kenya	Kenya|||Kenyan|||Laikipia region of Kenya.	1
6714536	Benin	Benin Republic	1
6714537	India	India|||Nepal	1
6714550	Tanzania	Tanzania|||Unguja IslandÃƒÂ¢Ã¢â€šÂ¬Ã¢â‚¬Å“ Zanzibar	1
6714567	India	India	1
6714568	China	three provinces of three large river basins in China: Guangdong in the Pearl River Basin, Shaanxi in the Yellow River Basin, and Qinghai in the Northwest Interior River Basin.|||China	1
6714569	Nepal	Nepal	1
6714416	Austria	Austria	1
6714437	Thailand	Thailand	1
6714438	Burkina Faso, Democratic Republic of the Congo, Kenya, India, Namibia	many different countries	0			1
6714440	Kenya	Kenya	1
6714441	Kenya	Kenya	1
6714452	Ethiopia	Ethiopia	1
6714453	Canada	Canada	1
6714454	Ghana, Mali, Niger, Senegal, Burkina Faso	West Africa|||Ghana, Mali, Niger, Senegal and Burkina Faso|||West Africa: Ghana, Mali, Niger, Senegal and Burkina Faso|||West Africa (Ghana, Mali, Niger, Senegal and Burkina Faso)	1
6714455	Malawi, Tanzania, Zambia	Malawi|||Tanzania|||Zambia|||Malawi, Zambia, and Tanzania|||Malawi, Tanzania and Zambia|||Malawi, Tanzania, Zambia|||Southern Africa	1
6714456	Nepal	Nepal|||Melamchi Valley, Nepal	1
6714458	Indonesia	Indonesia	1
6714459	Nigeria	Nigeria	1
6714460	Nigeria	south-west Nigeria,which encompasses the states of Lagos, Ogun, Oyo, Osun, Ondo, and Ekiti.|||South-West Nigeria	1
6714461	Ethiopia	Ethiopia|||the Muger Sub basin of the Upper Blue Nile basin of Ethiopia|||Upper Blue Nile basin of Ethiopia	1
6714463	Iran	Iran	1
6714464	Bangladesh	Bangladesh	1
6714465	Ghana	Ghana	1
6714466	Indonesia	Indonesia|||Java, Indonesia	1
6714469	Philippines	Philippines	1
6714470	Ghana	Ghana|||Savelugu Nanton, West Mamprusi and Kassena Nankana East Districts (Ghana)	1
6714471	Philippines	^Philipines|||Southern Philippines	1
6714472	France	France	1
6714474	Ghana	Ghana	1
6714475	Sri Lanka	Sri Lanka|||Sri LankaÃƒÂ¢Ã¢â€šÂ¬Ã¢â‚¬Å“ Ratnapura district	1
6714477	Malaysia	Malaysia|||Kedah district, Malaysia|||Malayasia	1
6714478	Kenya	Kenya	1
6714479	India	India	1
6714480	Indonesia	Indonesia	1
6714481	Ethiopia	Ethiopia	1
6714482	Mexico	Mexico	1
6714483	Niger	Niger	1
6714484	Nigeria	Nigeria|||Imo State, Nigeria	1
6714485	Pakistan	Pakistan|||Punjab, Pakistan	1
6714486	Thailand	Thailand	1
6714487	Cameroon	Cameroon|||West Africa|||Kribi-Campo Cameroon	1
6714489	Ghana, Burkina Faso	burkina faso|||ghana|||Upper East Ghana|||Southwest Burkina Faso|||West Africa	1
6714490	China	China	1
6714491	Kenya, Ethiopia, Uganda, Tanzania	Eastern Africa|||Kenya, Ethiopia, Tanzania, Uganda|||Kenya, Tanzania, Uganda and Ethiopia	1
6714492	Zimbabwe	Zimbabwe	1
6714494	India	India	1
6714497	Mexico, Guatemala	Guatemala|||Calakmul Biosphere Reserve in Mexico and Maya Biosphere Reserve in Guatemala|||Mexico, Guatemala	1
6714498	India	India|||Bihar	1
6714530	China	China|||Ningzia Hui Autonomous Region	1
6714499	Ghana	Ghana	1
6714500	Mexico, Spain	Mexico, Spain|||Spain|||Mexico|||Spain, Mexico	1
6714501	Sri Lanka	Sri Lanka	1
6714503	China	China|||Guangdong in South China and Shaanxi and Qinghai in Northwest China.	1
6714504	Guatemala, Honduras, El Salvador, Nicaragua, Jamaica, Mexico, United States	All countries in north and central america and the caribbean	0			1
6714505	Indonesia	Indonesia	1
6714506	Ethiopia	Ethiopia	1
6714507	United States	United States|||USA, Upper Midwest states|||Upper Midwest	1
6714508	India	India	1
6714510	Nepal	Nepal	1
6714511	Nepal	Nepal	1
6714512	Ghana	Ghana	1
6714513	Mexico	Mexico	1
6714514	Bangladesh	Bangladesh	1
6714515	Rwanda	Rwanda	1
6714516	USA	USA - Oregon|||United States	1
6714517	Kenya	Kenya	1
6714519	Iran	Iran|||Northern Iran	1
6714520	India	India	1
6714521	Botswana	Botswana	1
6714523	Nepal	Nepal	1
6714525	Ethiopia	Ethiopia	1
6714526	India	India	1
6714527	Mexico	Mexico	1
6714528	Botswana	Botswana	1

## Sheet: ExpertLevel2_Stakeholders
file	stake_holders	2.1.1.Actors.Institutions	2.1.2.Actors-Other	Resolve_EL2	Additions	Ommissions	Missing data in the Human coded set	llm extracted	human extracted	matches
6205524	Stake-holders: - Government (local) - International or multinational governance institutions - Civil society (international, multinational, national) - Individuals or households	Civil Society- international/multinational/national|||International or multinational governance institutions||| Individuals or households		0	1			4	3	3
6205525	Stake-holders: Individuals or households	Individuals or households		1				1	1	1
6205526	Stake-holders: - Government (sub-national): Extension officers from MAL and ZARI in Zambia, various departments in Malawi, Mozambique, and Zimbabwe - Civil society (international, multinational, national): The German Technical Cooperation (GIZ), the International Fund for Agriculture Development (IFAD), USAID - Civil society (sub-national or local): Agricultural Extension Development Officers (AE…	International or multinational governance institutions	CIMMYT|||CIRAD|||	0	1
6205528	Stake-holders: - Individuals or households - Civil society (local or sub-national) - Government (local)	Civil Society- sub-national or local||| Individuals or households	|||	0	1
6216010	Stake-holders: - Government (national) - Government (sub-national) - Civil society (international, multinational, national)	Individuals or households||| National government||| Other||| Civil Society- sub-national or local	research institution conducting participatory on-farm trials for DT maize|||	1
6216012	Stake-holders: Individuals or households	Other	|||on-farm plot (smallholder)	1
6216013	Stake-holders: - Government (national): German Federal Office of Plant Varieties - Government (sub-national): State field trials offices - Individuals or households: Farmers - Civil society (national): Agricultural advisors - Private sector (SME): Private agronomy consulting companies and plant breeding companies	Individuals or households||| National government||| Other	"private agricultural advisors" - unclear if corporations or SMEs|||Agriculture advisors	1
6216014	Stake-holders: - Government (Sub-national) - Civil society (Local) - Individuals or households	Civil Society- sub-national or local||| National government||| Individuals or households	|||Kenya Agricultural & Livestock Research Organization	1
6216015	Stake-holders: - Individuals or households - Government (local) - Civil society (sub-national or local)	Individuals or households||| Civil Society- sub-national or local	|||	0	1
6216017	Stake-holders: - Government (national): Nigeria - International or multinational governance institutions: International Institute of Tropical Agriculture (IITA) - Individuals or households: Farmers	Individuals or households	|||	0	1
6216019	Stake-holders: - Government (national) - Government (sub-national) - Government (local) - Private sector (corporations) - Farmers (Individuals or households)	Individuals or households||| Other	|||Insurance-provider	0	1
6216022	Stake-holders: - Individuals or households - Civil society (sub-national or local) - Civil society (international, multinational, national)	Individuals or households	|||	0	1
6216024	Stake-holders: International or multinational governance institutions, Government (local), Individuals or households	Individuals or households||| Civil Society- international/multinational/national||| National government|||International or multinational governance institutions	|||"US Agency for International Development and implemented"|||"Catholic Relief Services-led consortium of eight local non-governmental organizations (NGOs) implemented"|||Village groups|||village group,NGOs	0		1
6216026	Stake-holders: - Individuals or Households - Government (Local) - Civil Society (National and Local)	Individuals or households||| Local government||| Civil Society- sub-national or local		1
6216028	Stake-holders: - Government (national) - Government (local) - Individuals or households	Individuals or households	|||	0	1
6216030	Stake-holders: - Government (sub-national) - Civil society (local) - Individuals or households	Individuals or households||| Local government||| Private sector corporations	|||	0	1	1
6714220	Stake-holders: Individuals or households	Individuals or households||| Civil Society- sub-national or local	|||	0		1
6714222	Stake-holders: - Government (sub-national) - Civil society (local) - Individuals or households - Government (national) - Civil society (national)	Individuals or households||| Civil Society- sub-national or local||| Local government	|||	1
6714223	Stake-holders: - Individuals or households (farmers) - Civil society (sub-national or local) (Advisors)	Individuals or households	|||Farmers	0	1
6714224	Stake-holders: - Individuals or households - Government (sub-national) - Civil society (sub-national or local)	Individuals or households		0	1
6714225	Stake-holders: - Individuals or households - Civil society (sub-national or local) - Government (local) - Government (sub-national)	Individuals or households||| Civil Society- sub-national or local	|||	0	1
6714226	Stake-holders: - Government (sub-national): Department of Agricultural Extension (DAE) - Civil society (sub-national or local): Climate Field Schools (CFS), Farmer Associations - Individuals or households: Farmers	Individuals or households||| National government||| Civil Society- sub-national or local	agriculture officers	1
6714227	Stake-holders: - Individuals or households - Civil society (sub-national or local)	Individuals or households		0	1
6714228	Government (national):** The study and adaptation practices were supported by the "Department of Science and Technology (NRDMS Division), Ministry of Science and Technology, Government of India." - **Government (local):** The adaptation practices were executed in collaboration with local organizations and farmers. - **Individuals or Households:** The adaptation responses were carried out by "170 …	National government||| Individuals or households||| Civil Society- sub-national or local||| Other	Research institute: Central Research Institute for Jute and Allied Fibres|||Researchers	0		1
6714232	Stake-holders: - Laser leveller (Individuals or households) - Improvement in irrigation structure (Individuals or households) - Direct Seeded Rice (DSR) (Individuals or households) - Zero Till Wheat (ZTW) (Individuals or households) - Change in variety (Individuals or households)	Individuals or households	|||	0		1		1	1	1
6714233	Stake-holders: Individuals or households, Government (sub-national), Civil society (sub-national or local), Private sector (corporations)	Individuals or households	farmer's|||Farmers	0
6714234	Stake-holders: - Individuals or households - Government (sub-national)	Civil Society- sub-national or local||| Individuals or households	|||	0	1	1
6714235	Stake-holders: - Government (national) - Government (sub-national) - Government (local) - Private sector (corporations) - Individuals or Households	Individuals or households||| National government||| Local government||| Civil Society- sub-national or local	|||	0	1	1
6714238	Stake-holders: - Government (sub-national): Sikkim Government Horticulture and Cash Crops Development Department, Spices Board - Individuals or households	Individuals or households||| Sub-national government||| Civil Society- sub-national or local	progressive cardamom farmers and panchayat (elected representatives of the village, self-government) members from other cardamom-growing areas in Sikkim, academics, largecardamom scientists, extension and development workers, researchers, and professionals at the policy and planning|||Farmers, State Government|||Extension agencies|||	0		1
6714593	Stake-holders: - Civil society (international, multinational, national) - Civil society (sub-national or local) - Individuals or households	Individuals or households	|||	0	1
6714594	Stake-holders: - Government (national) - Government (sub-national) - Government (local) - Civil society (local) - Individuals or households	Civil Society- sub-national or local||| Local government||| Individuals or households	Community-based livestock management groups|||	1
6714596	Stake-holders: - Government (sub-national) - Government (local) - Individuals or households	Individuals or households||| National government		1
6714598	Stake-holders: - Government (national): Kenyan and Ethiopian national governments - Civil society (international, multinational, national): World Bank, Kenyan National Federation of Agricultural Producers, Ethiopian Institute of Agricultural Research - Government (sub-national): Embu District (Kenya), Adaâ€™a District (Ethiopia) - Individuals or households: Farmers in Embu and Adaâ€™a districts	Individuals or households||| Civil Society- international/multinational/national|||International or multinational governance institutions	|||	0	1	1
6714599	Stake-holders: - Government (sub-national): Nunavut territorial government agencies (GN), Government (local): Pangnirtung community members, Private sector (corporations): Pang Fisheries Ltd., Civil society (sub-national or local): Local community members, Individuals or households: Inuit fishers	Individuals or households||| Civil Society- sub-national or local||| National government||| Sub-national government||| Private sector SMEs	|||	1
6714600	Stake-holders: - Government (national) - Government (local) - Civil society (international, multinational, national) - Individuals or households	Individuals or households	|||	0	1
6714601	Stake-holders: - Government (national) - Individuals or households - Government (local)	Individuals or households	|||	0	1
6714602	Stake-holders: - Intercropping: Individuals or households - Crop Insurance: Government (national) - Micro-irrigation: Individuals or households, Government (national) - Varietal Diversification: Individuals or households, Government (national)	Individuals or households		0	1
6714603	Stake-holders: - Individuals or households - Private sector (corporations) - Government (national)	Individuals or households	|||Local Government	0	1
6714604	Stake-holders: - Government (sub-national) - Government (local) - Individuals or households - Civil society (local)	Local government||| Civil Society- sub-national or local||| Individuals or households	|||	1
6714606	Stake-holders: - Government (national) - Individuals or households	Civil Society- international/multinational/national||| Civil Society- sub-national or local||| Individuals or households||| National government|||International or multinational governance institutions||| Private sector corporations	|||	0		1
6714607	Stake-holders: - Government (National): Rwanda's government authorities and Ministry of Agriculture (MINAGRI) - Government (Local): Local administrators in Kibirizi sector - Individuals or Households: Smallholder farmers in Kibirizi who adapt their land use and livelihood strategies	Individuals or households||| Local government	|||	1
6714611	Stake-holders: - Government (local) - Civil society (national) - Civil society (sub-national or local) - Individuals or households	Individuals or households	|||	0	1
6714612	Stake-holders: - Individuals or households	Individuals or households	|||	1
6714613	Stake-holders: - Individuals or households (farmers) - Civil society (sub-national or local) - Government (local)	Individuals or households||| Civil Society- sub-national or local||| National government	|||Institutions|||	1
6714614	Stake-holders: - Individuals or households - Civil society (national) - Government (national)	Individuals or households||| Civil Society- sub-national or local		0	1
6714615	Stake-holders: - Individual farmers - Government (local) - Government (sub-national)	Individuals or households	|||	0	1
6714616	Stake-holders: - Government (local) - Civil society (local) - Individuals or households	Individuals or households||| Local government||| Other	|||Farmers' (Producers) Co-op'	1
6714617	Stake-holders: - Civil society (sub-national or local) - Individuals or households - Other: Community-based task forces and local authorities	Individuals or households	|||Rural dwellers	0	1
6714618	Stake-holders: - Individuals or households - Government (sub-national) - Civil society (national) - Civil society (sub-national or local)	Individuals or households		0	1
6714620	Stake-holders: - Government (national) - Government (local) - Individuals or households	National government||| Local government||| Individuals or households	|||	1
6714621	Stake-holders: - Government (local) - Individuals or households	Individuals or households	|||	0	1
6714622	Stake-holders: - Government (local) - Civil society (international, multinational, national) - Civil society (sub-national or local) - Individuals or households	Local government||| Civil Society- sub-national or local||| Individuals or households|||International or multinational governance institutions	|||Non Governmental Organizations	0		1
6714623	Stake-holders: - Individuals or households: Farmers and herdsmen adapting various techniques. - Government (local): Local government areas involved. - Civil society (sub-national or local): Agricultural extension workers assisting in adaptations.	Individuals or households		0	1
6714626	Stake-holders: - Introducing new crops like sesame, soybean, and peanuts: - Government (local) - International or multinational governance institutions (Development projects) - Farmers (individuals/households) - Planting new crop varieties with shorter growth cycles, higher yields, or better quality: - Government (local) - International or multinational governance institutions (Development projec…	Individuals or households	|||	0	1
6714627	Stake-holders: - Government (sub-national): - Excerpt: "The Department of Agriculture has also taken serious measures to promote DSR by conducting a large number of campaigns, group discussions and result demonstrations at village level." - Government (local): - Excerpt: "In the process, farmers, scientists, agricultural department, irrigation department, and media were brought together which hel…	Individuals or households		0	1
6714628	Stake-holders: Government (sub-national), Civil society (national)	Individuals or households||| Local government||| National government	|||	0	1	1
6714629	Stake-holders: Individuals or households	Individuals or households		1
6714630	Stake-holders: - Government (national): The U.S. 3rd National Climate Assessment Report outlines the need for accelerated adaptation to climate change. - Government (state and local): Regional collaborative projects funded by the USDA-NIFA. - Individuals or households (farmers): Farmers' survey responses and adaptive practices adopted for their lands indicate direct involvement.	Individuals or households	|||	0	1
6714632	Stake-holders: - Government (sub-national) - Civil society (sub-national or local) - Civil society (national) - International or multinational governance institutions	Individuals or households	|||	0	1
6714635	Stake-holders: Individuals or households, Government (sub-national), Civil society (sub-national or local)	Individuals or households		0	1
6714636	Stake-holders: - Government (sub-national): Uttar Pradesh Council of Agricultural Research, Government of Uttar Pradesh, Lucknow - Individuals or households - Private sector (SME) - Other (Agribusiness companies)	Individuals or households	|||Farmers	0	1
6714637	Stake-holders: - Government (national) - Individuals or households - Private sector (insurance companies)	National government||| Individuals or households	|||	0	1
6714638	Stake-holders: - Government (national) - Individuals or households - Civil society (national)	Civil Society- international/multinational/national||| Individuals or households||| Civil Society- sub-national or local	|||	0	1
6714639	Stake-holders: - Government (local) - Individuals or households	Individuals or households	|||	0	1
6714640	Stake-holders: - Government (national) - Government (local) - Individuals or households	Individuals or households	Government National and Local referred to in the introduction but not in reference to these particular adaptation measures.|||	0	1
6714642	Stake-holders: - Government (local) - Individuals or households - Civil society (international, multinational, national)	Individuals or households	|||	0	1
6714643	Stake-holders: - Individuals or households - Government (sub-national) - Civil society (sub-national or local)	Civil Society- sub-national or local||| Individuals or households	|||	0	1
6714644	Stake-holders: - Government (local): Conventional and organic farmers - Private sector (SME): Conventional and organic farmers	Individuals or households||| Private sector corporations	|||	0	1	1
6714646	Stake-holders: Individuals or households	Individuals or households		1
6714647	Stake-holders: Individuals or households, Government (sub-national)	Individuals or households	None others mentioned|||	0	1
6714650	Stake-holders: - International or multinational governance institutions: The World Bank - Civil society (international, multinational, national): Swedish Cooperative Centre-Vi Agroforestry (SCC-ViA) - Government (national): Ministry of Agriculture, Kenya	International or multinational governance institutions||| Individuals or households	Farmer-targeted intervention implementation by Swedish Cooperative Centre-Vi Agroforestry Program, co-financing from World Bank BioCarbon Fund and Swedish International Development Agency|||The KACP is implemented by the Swedish Cooperative Centre-Vi Agroforestry Program (SCC-ViA), and was co-financed by the World Bank BioCarbon Fund and the Swedish International Development Agency (SIDA)	0	1
6714652	Stake-holders: - Government (national) - Government (sub-national) - Civil society (national) - Individuals or households	Individuals or households|||International or multinational governance institutions||| Civil Society- international/multinational/national		0	1	1
6714653	Stake-holders: - Government (sub-national) - Government (local) - Individuals or households	Individuals or households||| Local government||| National government||| Sub-national government||| Private sector corporations	|||	0		1
6714654	Stake-holders: - Government (national) - Government (sub-national) - Civil society (sub-national or local)	Individuals or households||| Local government||| Other||| Civil Society- sub-national or local	Community Forest Groups|||members of community forest	1
6714655	Stake-holders: - Government (national): The Ethiopian government - Government (sub-national): Amhara National Regional State government - Civil society (sub-national or local): SUNARMA (Sustainable Natural Resource Management Association) - Individuals or households: Local smallholder farmers	Individuals or households||| Other	farmers|||	0	1
6714703	Stake-holders: - Individuals or households - Government (sub-national) - Civil society (national)	Individuals or households		0	1
6714704	Stake-holders: - Government (national) - Government (sub-national) - Civil society (local) - Individuals or households	Individuals or households		0	1
6714705	Stake-holders: - Individuals or households - Government (local)	Individuals or households	|||	0	1
6714707	Stake-holders: - Government (sub-national): Punjab Planning and Development Department (P&DD), Sindh Planning and Development Department (P&DD) - Civil society (national): World Wildlife Fund for Nature-Pakistan - International or multinational governance institutions: International Development Research Centre, European Union	Individuals or households		0	1
6714709	Stake-holders: - Government (local): Department of Agriculture, Food and Forestry of Guadeloupe (DAAFG) - Individuals or households (farmers) - Academia / Research Institutes: INRA, UR1321, ASTRO, AgrosystÃ¨mes Tropicaux - Civil Society (International/National)	Individuals or households	|||	0	1
6714811	Stake-holders: - Individuals or households - Government (national) - Civil society (sub-national or local)	Individuals or households		0	1
6714813	Stake-holders: - Government (national) - Government (local) - Civil society (local) - Individuals or households	Individuals or households||| National government	|||Herders, Napalese Government|||	0	1
6714817	Stake-holders: - Government (sub-national): Regional agricultural extension services - Civil society (international, multinational, national): UNECA, FAO, CCAFS - Individuals or households: Farmers in the study areas	Individuals or households|||International or multinational governance institutions	|||	0	1
6714819	Stake-holders: - Government (sub-national): with the collaboration of local Consortia and Certification bodies - Private sector (SME): Based on the scientific literature reviewed, a set of research hypotheses was formulated and compared with empirical evidence collected... primary information on wine growing and wine making firms was gathered by means of a producer survey, including 56 wine farms	Individuals or households||| Civil Society- sub-national or local	|||	0	1
6714820	Stake-holders: Individuals or households, Government (national), Government (sub-national), Civil society (national), Private sector (SME)	Individuals or households||| National government|||International or multinational governance institutions	|||EU	0	1
6714571	Stake-holders: Individuals or households	Individuals or households	|||	1
6714573	Stake-holders: - Government (sub-national): National Drought Management Authority, Ministry of Northern Kenya ASAL Secretariat - Civil society (international, multinational, national): Netherlands Red Cross, Catholic Organization for Relief and Development Aid, CARE Netherlands, Red Cross/Red Crescent Climate Centre, Wetlands International - Civil society (sub-national or local): Kenya Red Cross …	Individuals or households||| Local government	|||Pastoralists, farmers, agro-pastoralists and non-agro pastoralists.	0	1
6714574	Stake-holders: - Individuals or households - Government (local) - Civil society (sub-national or local)	Individuals or households||| Sub-national government||| National government	|||farmers	0	1
6714575	Stake-holders: - Civil society (international, multinational, national) - Civil society (sub-national or local) - Individuals or households - Government (national) - Private sector (corporations) - Government (local)	Individuals or households	|||	0	1
6714577	Stake-holders: - Government (national) - Civil society (international, multinational, national) - Individuals or households	Individuals or households||| Local government||| Civil Society- international/multinational/national	|||	1
6714578	Stake-holders: - Government (national) - Government (local) - Individuals or households	Individuals or households||| National government		1
6714579	Stake-holders: Individuals or households, Sub-national government, Civil society (sub-national or local)	Individuals or households		0	1
6714580	Stake-holders: - Individuals or households - Civil society (local) - Government (national) - International or multinational governance institutions	Individuals or households	|||Farmers	0	1
6714581	Stake-holders: Individuals or households	Individuals or households||| Civil Society- international/multinational/national	|||	0		1
6714582	Stake-holders: - Individuals or households - Government (sub-national) - Civil society (sub-national or local)	Individuals or households	|||	0	1
6714585	Stake-holders: - Government (national) - Government (local) - Individuals or households	Individuals or households||| Civil Society- international/multinational/national	|||	0	1	1
6714586	Stake-holders: - Government (sub-national): The local administrative structures within the Mutoko rural district. - Government (local): The municipalities and local governance units within the Mutoko rural district. - Civil society (sub-national or local): Local community associations and rural community members who practice these adaptation measures. - Individuals or households: Farmers and hous…	Individuals or households	|||Farmers	0	1
6714587	Stake-holders: Smallholder farmers (Individuals or households)	Individuals or households	|||	1
6714588	Stake-holders: - Government (national) - Government (local) - Civil society (local) - Individuals or households	Individuals or households||| National government||| Private sector corporations||| Local government||| Civil Society- sub-national or local	|||	0		1
6714590	Stake-holders: - Individuals or households - Government (local) - Civil society (national)	Individuals or households	|||	0	1
6714592	Stake-holders: - Individuals or households - Government (sub-national) - Civil society (sub-national or local)	Individuals or households||| National government||| Civil Society- sub-national or local||| Civil Society- international/multinational/national	|||	1
7851117	Stake-holders: - Government (national) - Government (sub-national) - Government (local) - Individuals or households (farmers)	Individuals or households||| Local government||| National government		1
7851118	Stake-holders: - Civil society (sub-national or local) - Individuals or households - Civil society (international or multinational) - Civil society (international, multinational, national)	Civil Society- international/multinational/national||| Civil Society- sub-national or local||| Individuals or households||| Other	Policy makers	0		1
7851127	Stake-holders: Government (local), Civil society (sub-national or local), Individuals or households	Individuals or households		0	1
7851128	Stake-holders: Government (sub-national)	Individuals or households	|||farmers|||Farmers (Rice cultivating)	0	1	1
7851132	Stake-holders: - Individuals or households: Farmers adapting cropping dates and cultivars - Government (local): Dissemination of climate information	Individuals or households		0	1
7851134	Stake-holders: - Civil society (international, multinational, national): Environmental Defense Fund de MÃ©xico A.C., Pronatura Noroeste, Comunidad y Biodiversidad A.C., Sociedad de Historia Natural NiparajÃ¡ A.C. - Government (national): Instituto Nacional de Pesca y Acuacultura, ComisiÃ³n Nacional para el Conocimiento y Uso de la Biodiversidad - Government (local): Small-scale fishing communitie…	Individuals or households||| Civil Society- international/multinational/national||| Sub-national government||| Local government||| Civil Society- sub-national or local		0	1
7851142	Stake-holders: - Government (sub-national): as a part of convergence initiatives under the MGNREGS - Civil society (national): Professional Assistance for Development Action (PRADAN) is an organization (NGO) act as a technical resource agency - Individuals or households: Participation of the small and marginal farmers in different stages of project	Individuals or households		0	1	1
7851155	Stake-holders: - Government (national) - Government (local) - Individuals or households - Civil society (local)	Individuals or households	|||Farmers	0	1
7851158	Stake-holders: - Government (local): Farmers and local farmer associations within the Atakora region. - Individuals or Households: The farmers who practice and implement these adaptation strategies. - Civil Society (sub-national or local): Village chiefs and local farmers' associations facilitating the organization of meetings and data collection.	Individuals or households	|||	0	1
7851161	Stake-holders: - Government (local): Local agricultural supervisors and extension offices - Civil society (international, multinational, national): NGO implementing irrigation rehabilitation project - Individuals or households: Farmers participating in agricultural classes	Individuals or households||| Civil Society- sub-national or local||| Local government		1
7851163	Stake-holders: - Individuals or households - Government (local) - Government (sub-national)	Individuals or households		0	1
7851165	Stake-holders: - Government (local) - Individuals or households	National government||| Local government||| Individuals or households||| Civil Society- sub-national or local	'Water management committee'|||	0		1
7851166	Stake-holders: - Government (national) - Government (local) - Individuals or households - Civil society (national)	Individuals or households||| National government		0	1
7851169	Stake-holders: Government (sub-national), Civil society (national), Individuals or households	Individuals or households||| Other	|||Policy makers	0	1
6714240	Stake-holders: - Individuals or households: Private forest owners - Civil society (sub-national or local): SRFB (SociÃ©tÃ© Royale ForestiÃ¨re de Belgique) - Government (sub-national): Regional forest agencies in Wallonia - Private sector (SME): Timber professionals including nursery operators and forestry experts	Sub-national government||| Private sector SMEs||| Civil Society- international/multinational/national||| Civil Society- sub-national or local	|||Training/education organization	1
6714241	Stake-holders: - Government (sub-national): Ekiti State Agricultural Development Programme (ADP) - Individuals or households: The local yam farmers - Civil society (sub-national or local): Cooperative societies and farmers' associations	Individuals or households	|||	0	1
6714242	Stake-holders: Individuals or households, Government (sub-national)	Individuals or households	|||	0	1
6714243	Stake-holders: - Individuals or households - Government (local) - Civil society (sub-national or local)	Individuals or households		0	1
6714245	Stake-holders: - Government (sub-national) - Individuals or households - Civil society (local) - Private sector (SME)	Individuals or households	|||Not Applicable (NA)	0	1
6714246	Stake-holders: Individuals or households, Government (sub-national)	Individuals or households		0	1
6714247	Stake-holders: - Government (national) - Fish Producer Organizations (Civil society - sub-national or local) - International or multinational governance institutions - Individuals or households - Private sector (SME) - Civil society (national)	Civil Society- sub-national or local	|||	0	1
6714248	Stake-holders: - Government (local) - Civil society (international, multinational, national) - Civil society (sub-national or local) - Individuals or households	Civil Society- international/multinational/national||| Individuals or households||| Civil Society- sub-national or local		0	1
6714249	Stake-holders: - Government (local) - Individuals or households - Civil society (local)	Individuals or households	|||Pastoralists|||	0	1
6714250	Stake-holders: - Individuals or households - Government (sub-national) - Civil society (local and regional) - Government (local and sub-national)	Individuals or households||| Local government	|||	0	1
6714251	Stake-holders: Individuals or households, Government (local)	Individuals or households	|||	0	1
6714252	Stake-holders: - Government (local) - Civil society (international, multinational, national) - Individuals or households	Individuals or households		0	1
6714253	Stake-holders: - Government (local) - Individuals or households	Individuals or households||| National government||| Local government	|||	1
6714254	Stake-holders: - Individuals or households - Government (sub-national)	Individuals or households	|||	0	1
6714255	Stake-holders: - Government (local): Participants selected from pastoral community including both genders, different age groups, and tribal groups in different localities with the aid of extension officers from the ministry of agriculture and field assistants recruited from the villages. - Individuals or households: Most households keep diversified livestock such as cattle, sheep, goats, donkeys,…	Individuals or households||| Other||| National government	Village leaders	0	1
6714256	Stake-holders: - Government (national) - Civil society (international, multinational, national) - Government (local) - Individuals or households	Civil Society- sub-national or local||| Individuals or households	|||	0	1
6714259	Stake-holders: Farmers and Households	Individuals or households||| National government||| Sub-national government	|||	0		1
6714260	Stake-holders: - Individuals or households	Individuals or households||| Local government	|||	0		1
6714261	Stake-holders: - Government (local) - Individuals or households	Individuals or households||| National government	|||	1
6714263	Stake-holders: - Government (national) - Government (local) - Civil society (international, multinational, national) - Civil society (sub-national or local) - Individuals or households	Individuals or households||| Civil Society- sub-national or local||| National government||| Civil Society- international/multinational/national||| Local government	|||	1
6714264	Stake-holders: - Government (local) - Civil society (sub-national or local) - Individuals or households	Individuals or households		0	1
6714267	Stake-holders: - Government (national) - Government (sub-national) - Civil society (national) - Individuals or households	Local government||| Other||| National government||| Civil Society- international/multinational/national||| Individuals or households	ey stakeholders (local climatechange experts and decision makers) were consulted tobetter define and describe adaptation actions|||Farmer groups	1
6714268	Stake-holders: - Government (national) - Civil society (international, multinational, national) - Individuals or households - Other (development organizations and donors)	Individuals or households||| Local government||| National government	|||	0	1
6714269	Stake-holders: - Government (national) - Government (sub-national) - Government (local) - Individuals or households - Private sector (SME)	Individuals or households||| National government	|||The survey included separate questionnaires for farmers and village leaders and covered a wide range of issues|||farmers|||Farmers	0	1
6714605	Stake-holders: - Government (local): Community-level engagement through Farmer Field Schools (FSS) - Individuals or households: Farmers implementing reforestation - Civil society (national): Participation via MAP and localized interventions - Individuals or households: Farmers adapting to climate change - Civil society (national): Support through Farmer Field Schools	Individuals or households	|||	0	1
6714641	Stake-holders: - Government (sub-national) - International or multinational governance institutions	Individuals or households	|||	0	1	1
6714657	Stake-holders: - Building Permanent Houses and Winter Shelters: Government (national), Civil society (sub-national or local) - Planting Artificial Grasses and Grains: Government (national), Community institutions - Purchasing Forage from Markets: Market institutions (private sector SMEs), Government (national and local) - Increasing the Amount of Hay Cut from Pastures: Civil society (sub-national…	Individuals or households||| Local government	herder communities|||	0	1	1
6714658	Stake-holders: - Government (national) - Government (sub-national) - Individuals or Households	Civil Society- sub-national or local||| National government||| Individuals or households	|||NGOs mentioned but not specified - in recommendations rather than involved in the responses	1
6714659	Stake-holders: - Individuals or households - Government (local) - Government (sub-national)	Individuals or households		0	1
6714660	Stake-holders: - Government (sub-national) - Civil society (national) - Individuals or households	Individuals or households||| Civil Society- sub-national or local	|||	0	1
6714661	Stake-holders: - Individuals or households - Government (sub-national) - Government (national) - Civil society (international, multinational, national) - International or multinational governance institutions	Individuals or households	|||	0	1
6714664	Stake-holders: - Individuals or households - Government (local)	Individuals or households	|||	0	1
6714665	Stake-holders: - Government (national) - Individuals or households	Civil Society- sub-national or local||| Individuals or households||| National government||| Sub-national government||| Local government||| Other||| Private sector corporations	Fishing cooperatives|||Cooperatives|||	0		1
6714666	Stake-holders: Government (local), Civil society (local), Individuals or households	Other||| Individuals or households		0	1		1
6714667	Stake-holders: Government (national), Civil society (international, multinational, national), Individuals or households	Civil Society- international/multinational/national||| Individuals or households		0	1
6714670	Stake-holders: - Government (national) - Individuals or households - Government (local)	Individuals or households		0	1
6714671	Stake-holders: - Government (local): Local administration - Individuals or households: Local farmers, villagers - Individuals or households: Local farmers	Civil Society- sub-national or local||| Individuals or households||| Local government	individuals|||rather communal|||	0		1
6714673	Stake-holders: - Government (national) - Civil society (international, multinational, national) - Individuals or households - Civil society (sub-national or local)	Individuals or households||| Civil Society- international/multinational/national	|||	0	1
6714674	Stake-holders: - Individuals or households - Government (local) - Civil society (sub-national or local)	Individuals or households	|||Farmers|||	0	1
6714677	Stake-holders: - Government (national) - Government (sub-national) - Government (local) - Private sector (SME) - Civil society (national) - Individuals or households	Individuals or households||| National government||| Local government		0	1
6714679	Stake-holders: - Government (national): Sri Lankan government - Civil society (national): National agricultural advisory service - Individuals or households: Farmers	Individuals or households||| National government		0	1
6714680	Stake-holders: - Individuals or households - Government (local)	Local government||| Individuals or households	|||Farmers	1
6714682	Stake-holders: - Government (national) - Individuals or households	Individuals or households||| Private sector corporations||| National government	|||	0		1
6714683	Stake-holders: - Government (local) - Civil society (sub-national or local) - Individuals or households	Individuals or households||| Sub-national government||| Civil Society- sub-national or local		1
6714684	Stake-holders: Individuals or households, Government (local)	Individuals or households	University of the Philippines. Division of Social Sciences|||	1
6714686	Stake-holders: - Individuals or Households	Individuals or households||| Civil Society- sub-national or local||| Sub-national government		0		1
6714687	Stake-holders: - Individuals or households - Civil society (sub-national or local) - Government (sub-national)	Individuals or households||| Civil Society- sub-national or local	|||	0	1
6714688	Stake-holders: Individuals or households, Civil society (sub-national or local)	Individuals or households	|||	0	1
6714689	Stake-holders: - Civil society (sub-national or local) - Individuals or households	Individuals or households||| Civil Society- sub-national or local	"community-based organizations"|||	1
6714690	Stake-holders: - Government (national) - Government (sub-national) - Civil society (international, multinational, national) - Civil society (sub-national or local) - Individuals or households	Individuals or households||| Civil Society- sub-national or local|||International or multinational governance institutions||| Local government||| Civil Society- international/multinational/national	|||Community Forest User Groups (CFUGs)	0		1
6714692	Stake-holders: - Government (national): Kenyaâ€™s Ministry of Agriculture - Government (local): Community irrigation project managers, local governing community (Water Resource Users Associations) - Individuals or households: Smallholder farmers - Civil society (national): Nongovernmental organizations (NGOs)	Individuals or households||| Sub-national government||| Other	agricultural extension officers|||Agricultural Extension officers	0	1	1
6714695	Stake-holders: Government (sub-national), Government (local), Individuals or households, Civil society (sub-national or local)	Individuals or households	Farmers	0	1
6714696	Stake-holders: - Individuals or households - Government (local) - Civil society (sub-national or local)	Individuals or households||| National government||| Sub-national government||| Civil Society- sub-national or local	|||	1
6714697	Stake-holders: - Individuals or households - Government (local) - Government (sub-national)	Individuals or households	|||	0	1
6714698	Stake-holders: - Government (sub-national): Iringa Rural District authorities - Government (local): Village Executive Officers, District Agricultural Officers, Agricultural Extension Officers - Individuals or households: Farmers practicing the vinyungu system - Civil society (sub-national or local): Local villagers and community associations involved in agriculture practices	Individuals or households||| Local government||| Civil Society- sub-national or local	|||	1
6714699	1. **Government (sub-national)**: The states of Ekiti, Ondo, Osun, and Oyo. 2. **Individuals or households**: Fish farmers adapting practices individually. 3. **Civil society (sub-national or local)**: Local associations providing support.	Individuals or households||| Local government||| Civil Society- sub-national or local||| National government||| Private sector corporations	|||Article alludes that other actors aren't involved in adaptive responses - presumed autonomous|||	0		1
6714701	Stakeholders: Government (sub-national), Private sector (SME), Civil society (national)	Individuals or households	farmers and farm workforce (managers and employees)|||	0	1
6714702	Stake-holders: - International or multinational governance institutions - Government (national) - Government (local) - Civil society (local) - Individuals or households	Individuals or households||| National government||| Civil Society- international/multinational/national|||International or multinational governance institutions||| Civil Society- sub-national or local||| Private sector SMEs	farmer organisations|||international NGO- ICRISAT|||international NGO- CIRAD|||NGO|||	0		1
6216006	Stake-holders: - International or multinational governance institutions: CGIAR (CCAFS program) - Government (national): Kenyan and Senegalese national meteorological agencies - Government (sub-national): Extension services in Kenya - Government (local): Local leaders in Kenya and Senegal - Civil society (international, multinational, national): International Center for Research in Agroforestry (I…	Individuals or households	|||	0	1
6714270	Stake-holders: - Government (national) - Government (sub-national) - Government (local) - Individuals or households - Civil society (sub-national or local)	Individuals or households||| National government||| Sub-national government||| Local government	|||	0	1
6714271	Stake-holders: Individuals or households	Individuals or households||| National government	|||	0		1
6714272	Stake-holders: Individuals or households, Government (national), Government (sub-national), Civil society (national)	Individuals or households		0	1
6714273	Stake-holders: Individuals or households	Individuals or households||| Other	autonomous|||households|||membership of farmers association	0	1
6714274	Stake-holders: - Government (national) - Private Sector (corporations) - Civil society (international, multinational, national) - Individuals or households	Individuals or households||| National government		0	1
6714275	Stake-holders: - Government (local) - Individuals or Households	Individuals or households		0	1
6714276	Stake-holders: Government (national), Government (local), Civil society (sub-national or local), Individuals or households	Individuals or households||| Civil Society- sub-national or local		0	1
6714277	Stake-holders: - Government (local): Local village committees - Individuals or households: Local farmers and individual households	Individuals or households		0	1
6714278	Stake-holders: Individuals or households	Individuals or households	|||	1
6714279	Stake-holders: Individuals or households	Individuals or households||| National government	|||	0		1
6714281	Stake-holders: Individuals or households, Government (local), Government (national), Civil society (sub-national or local)	Individuals or households	|||	0	1
6714283	Stake-holders: International or multinational governance institutions, Government (national), Private sector (corporations), Civil society (international, multinational, national), Individuals or households	Individuals or households||| National government||| Private sector corporations||| Local government||| Civil Society- international/multinational/national||| Civil Society- sub-national or local	|||National government|||Private sector|||	1
6714284	Stake-holders: - Civil society (sub-national or local) - Government (local) - Individuals or households - International or multinational governance institutions - Civil society (international, multinational, national)	Civil Society- international/multinational/national||| Individuals or households||| National government||| Civil Society- sub-national or local||| Other|||International or multinational governance institutions||| Local government	A new organization made up of local and national representatives that manage a forest reserve.|||	1
6714285	Stake-holders: Individuals or households, Government (local), Government (national)	Individuals or households	|||	0	1
6714287	Stake-holders: - International or multinational governance institutions: International Center for Tropical Agriculture (CIAT), International Institute of Tropical Agriculture (IITA), World Agroforestry Centre (ICRAF), Centre de CoopÃ©ration International en Recherche Agronomique pour le DÃ©veloppement (CIRAD), CGIAR Research Program on Climate Change, Agriculture and Food Security (CCAFS) - Gover…	Individuals or households	|||	0	1
6714288	Stake-holders: - Individuals or households - Government (sub-national) - Civil society (national)	Individuals or households||| National government||| Other	Others: Representatives of different administrative departments|||	0	1
6714289	Stake-holders: - Government (sub-national) - Civil society (sub-national or local) - Individuals or households	Individuals or households||| Civil Society- sub-national or local	|||	0	1
6714290	Stake-holders: - Individuals or households: Smallholder farmers - Government (local): Administrative support in Cassou, a district head of the Ziro province - Civil society (international, multinational, national): TREE AID, FRUITEQ, World Agroforestry Center (ICRAF), the National Seed Centre of Burkina Faso (CNSF), SOS Sahel	International or multinational governance institutions||| Individuals or households||| National government||| Private sector corporations||| Civil Society- international/multinational/national||| Private sector SMEs||| Civil Society- sub-national or local||| Other	|||local leaders, farmers groups, fruit export conmpanies	0		1
6714291	Stake-holders: - Government (national) - Government (sub-national) - Civil society (sub-national or local) - Individuals or households - Government (local)	Local government||| National government||| Individuals or households||| Civil Society- sub-national or local	|||	1
6714292	Stake-holders: - Individuals or households - Government (local)	Individuals or households||| Local government	|||	1
6714293	Stake-holders: Individuals or households	Individuals or households	Farmers and pastoralists|||Farming households|||	1
6714294	Stake-holders: Individuals or households, Government (sub-national), Civil society (sub-national or local)	Individuals or households||| Local government||| Civil Society- sub-national or local	|||Smallholder farmers|||	1
6714295	Stake-holders: - Individuals or households - Government (local)	Individuals or households		0	1
6714296	Stake-holders: Individuals or households, Civil society (sub-national or local)	Individuals or households||| Civil Society- international/multinational/national	|||smallholder farmers|||	1
6714706	Stake-holders: - International or multinational governance institutions - Government (local) - Private sector (SME) - Civil society (international, multinational, national) - Individuals or households	International or multinational governance institutions||| Other||| Local government||| Private sector corporations||| Individuals or households||| Civil Society- sub-national or local	International nonprofit organization|||Farmers	1
6714711	Stake-holders: - Government (national): United States Department of Agriculture, Forest Service, Northeast Climate Hub - Government (state): State (Vermont Agency of Agriculture Food and Markets, the Vermont State Climate Office) - Government (local): Local agricultural advisors advising on BMPs - Individuals or households: Farmers implementing conservation BMPs like cover cropping, reduced tilla…	Individuals or households		0	1
6714712	Stake-holders: - Private sector (corporations) - Individuals or households	Individuals or households	|||	0	1
6714713	Stake-holders: - Individuals or households: Farmers	Individuals or households||| Civil Society- sub-national or local	|||	0		1
6714714	Stake-holders: - Individuals or households - Government (local) - Civil society (sub-national or local) - Private sector (corporations)	Individuals or households	|||	0	1
6714716	Stake-holders: - Government (local): Rural communities in Kwara State - Individuals or households: Farmers, fishermen, and other primary producers - Civil society (sub-national or local): Local community associations and leaders - Other: Research assistants from local communities	Individuals or households		0	1
6714718	Stake-holders: - Individuals or households - Civil society (sub-national or local)	Individuals or households	|||	0	1
6714720	Stake-holders: Government (local, sub-national), Private sector (agricultural materials companies), Individuals or households (local farmers)	Individuals or households||| National government||| Local government||| Sub-national government||| Private sector corporations||| Private sector SMEs	In this study, local adaptation responses... have been implemented by rice farmers to cope with climate change|||CSA was introduced to rice farmers by local government and institutions (e.g., Ministry of Agriculture and Rural Development, Department of Agriculture and Rural Development at provincial level) and agricultural materials companies (e.g., fertilizer companies, chemical companies)	1
6714721	Stake-holders: Government (sub-national), Individuals or households	Individuals or households		0	1
6714722	Stake-holders: Individuals or households	Individuals or households||| Local government	Coffee farmers|||	0		1
6714723	Stake-holders: - Individual or households - Government (local)	Individuals or households		0	1
6714724	Stake-holders: - Individuals or households (farmers) - Private sector (corporations) - Government (local) - Government (national)	Individuals or households	|||	0	1
6714727	Stake-holders: - Government (national): Austrian Regional Chambers of Agriculture (indicated indirectly via gatekeepers) - Government (sub-national): Farmers - Individuals or households: Farmers themselves	Individuals or households		0	1
6714728	Stake-holders: Individuals or households	Individuals or households	|||	1
6714731	Stake-holders: - Individuals or households - Civil society (national) - Government (local)	Individuals or households||| Local government||| Sub-national government||| Civil Society- sub-national or local||| National government	NGOs|||	1
6714732	Stake-holders: Government (sub-national), Private sector (corporations), Civil society (international, multinational, national), Individuals or households	Local government||| Private sector SMEs||| Individuals or households||| Other||| Civil Society- international/multinational/national||| Private sector corporations|||International or multinational governance institutions||| National government||| Civil Society- sub-national or local	|||conservancy managers|||tourism investors|||	0		1
6714733	Stake-holders: Government (sub-national), Civil society (international, multinational, national), Individuals or households	Individuals or households||| Civil Society- sub-national or local	|||union councils|||	0	1
6714734	Stake-holders: - Individuals or households	Individuals or households		1
6714736	Stake-holders: - Government (national): Governments of Bangladesh, Bhutan, Nepal, and India - Government (sub-national): State climate action plans implemented in India - Civil society (international, multinational, national): Non-governmental organizations and international development agencies - Individuals or households: Small farm holders in South Asia	National government||| Civil Society- international/multinational/national||| Individuals or households|||International or multinational governance institutions	|||	1
6714737	Stake-holders: - Government (national) - Government (sub-national) - Civil society (sub-national or local) - Individuals or households - Other: Public institutions associated with the PAA program	National government||| Individuals or households		0	1
6714738	Stake-holders: Individuals or households, Government (national), Civil society (sub-national or local)		|||	0			1
6714739	Stake-holders: - Individuals or households - Civil society (national) - Government (sub-national)	Individuals or households	|||	0	1
6714740	Stake-holders: - Individuals or households - Civil society (sub-national or local)	Individuals or households	|||National parks	0	1
6714744	Stake-holders: - Civil society (international, multinational, national) - Individuals or households - Government (sub-national) - Civil society (sub-national or local)	Individuals or households	|||	0	1
6714746	Stake-holders: - Government (sub-national): Odisha Watershed Development Mission (OWDM) - Civil society (international, multinational, national): United Kingdomâ€™s Department for International Development - Individuals or households: Farm households	Individuals or households||| Local government||| Sub-national government|||International or multinational governance institutions	|||	0	1
6714747	Stake-holders: - Individuals or households - Government (sub-national) - Civil society (national/local)	Other	|||Paddy cultivars|||Rice production systems	0			1
6714749	Stake-holders: - Individuals or households - Government (national) - Private sector (SME) - Civil society (international)	Individuals or households||| Local government||| Civil Society- sub-national or local	|||	0	1
6714752	Stake-holders: - Government (sub-national): University of California Cooperative Extension, California Department of Water Resources, San Luis Obispo County Agricultural Commissionerâ€™s Office - Individuals or households: Ranchers - Civil society (sub-national or local): Local Cooperative Extension - Civil society (national): University of California Research and Extension Centers - Other: Agric…	Individuals or households||| Local government||| National government||| Civil Society- sub-national or local	|||Ranchers|||	1
6714756	Stakeholders: - Individuals or Households - Civil Society (Sub-national or Local)	Individuals or households||| National government		0	1	1
6714757	Stake-holders: - Individuals or households - Government (national) - Civil society (international, multinational, national)	Individuals or households||| Civil Society- sub-national or local|||International or multinational governance institutions	|||Cereal crop farmers	0	1	1
6714758	Stake-holders: - Government (local): Farmers and local government units (municipalities, communities within districts) - Individuals or households: Farmers in the selected villages - Civil society (sub-national or local): Community service organizations (CSOs), BAIF Development Research Foundation	Individuals or households		0	1
6714760	Stake-holders: - Individuals or households - Government (sub-national)	Individuals or households	|||	0	1
6714761	Stake-holders: - Individuals or households - Government (sub-national)	Individuals or households	|||	0	1
6714763	Stake-holders: - Government (national) - Government (sub-national) - Individuals or households	Individuals or households	Bancs and other sources of financial support|||	0	1
6714764	Stake-holders: - Government (sub-national): Barind Multipurpose Development Authority (BMDA) - Individuals or households: Farmers	Individuals or households||| National government||| Local government	|||	1
6714767	Stake-holders: - Individuals or households (Farmers) - Government (local) - Civil society (sub-national or local)	Individuals or households	farmers group|||	0	1
6714769	Stake-holders: - Vietnam: - Government (local) - Individuals or households - Private sector (SME) - Kenya: - Government (local) - Individuals or households - Civil society (local)	Civil Society- international/multinational/national||| Individuals or households||| Civil Society- sub-national or local||| National government||| Local government	|||	0	1
6714771	Stake-holders: - Individuals or households - Government (local)	Individuals or households||| Civil Society- sub-national or local||| Other	rural farmers	0	1	1
6714297	Stake-holders: Individuals or households, Government (local)	Individuals or households	|||Farmers|||	0	1
6714298	Stake-holders: - Government (national) - Government (sub-national) - Government (local) - Civil society (national) - Individuals or households	Civil Society- sub-national or local||| Local government||| Private sector SMEs||| Individuals or households		0		1
6714299	Stake-holders: - Government (national) - Government (local) - Civil society (sub-national or local) - Individuals or households	Individuals or households||| Local government||| National government	|||	0	1
6714300	Stake-holders: Individuals or households	Individuals or households||| Other||| Private sector SMEs	"local markets" (informal market for seeds, as opposed to private formal sector seed sellers)|||	0		1
6714301	Stake-holders: - Government (national) - Government (sub-national) - Government (local)	National government||| Local government	|||	1
6714302	Stake-holders: - Individuals or households - Civil society (sub-national or local)	Individuals or households||| Local government||| National government||| Private sector corporations	|||	0	1	1
6714303	Stake-holders: - Government (national) - Individuals or households (farmers)	Individuals or households	|||	0	1
6714304	Stake-holders: - Government (local) - Civil society (international, multinational, national) and Private sector (corporations) - Individuals or households - Civil society (sub-national or local)	Individuals or households|||International or multinational governance institutions||| Civil Society- international/multinational/national||| Private sector SMEs	|||	0	1	1
6714305	Stake-holders: - Individuals or households	Individuals or households||| Civil Society- international/multinational/national	|||	0		1
6714307	Stake-holders: - Individuals or households - Government (sub-national) - Civil society (international, multinational, national)	Individuals or households	|||	0	1
6714309	Stake-holders: - Government (sub-national) - Individuals or households - Civil society (national) - Private sector (SME)	Civil Society- sub-national or local||| Individuals or households||| Local government	|||	0	1
6714310	Stake-holders: Individuals or households, Civil society (sub-national or local), Government (sub-national)	Individuals or households		0	1
6714311	Stake-holders: Government (sub-national), Individuals or Households	Individuals or households	|||	0	1
6714312	Stake-holders: Government (national), Civil society (international, multinational, national)	Local government||| Civil Society- sub-national or local||| Individuals or households	|||farmers|||Local farming communities|||Farmers	0		1
6714313	Stake-holders: - Government (sub-national) - Government (local) - Individuals or households	Individuals or households||| Civil Society- sub-national or local	|||	0	1	1
6714314	Stake-holders: - Government (local) - Civil society (sub-national or local) - Individuals or households	Individuals or households		0	1
6714315	Stake-holders: - Government (national) - Government (sub-national) - Individuals or households - Civil society (sub-national or local)	Individuals or households	|||	0	1
6714316	Stake-holders: - Government (national): Ministry of Agriculture, Bangladesh Water Development Board (BWDB), Barind Multipurpose Development Authority (BMDA) - Government (sub-national): Upazila Nirbahi Officer (UNO), Upazila Agricultural Officer (UAO) - Government (local): Department of Agricultural Extension (DAE), various upazila level administrative units - Civil society (national): Non-Govern…	Individuals or households||| Local government||| Civil Society- sub-national or local		1
6714317	Stake-holders: - Government (sub-national) - Government (local) - Individuals or households (farmers)	Individuals or households||| Other	|||Farmers	0	1
6714318	Stake-holders: - Individuals or households - Government (local) - Civil society (sub-national or local)	Local government||| Individuals or households	|||farmers	0	1
6714319	Stake-holders: - Individuals or households	Individuals or households	|||	1
6714320	Stake-holders: - Government (local) - Individuals or households	Individuals or households	|||	0	1
6714321	Stake-holders: - Individuals or Households - Government (local)	Individuals or households	|||	0	1
6714322	Stake-holders: - Individuals or households - Government (local): Minnesota - Government (local): Wisconsin - Government (local): Michigan	Individuals or households||| Private sector SMEs	|||	0	1	1
6714323	Stake-holders: - Government (local) - Individuals or households	Individuals or households	|||	0	1
6714324	Stake-holders: Individuals or households	Individuals or households	|||	1
6714325	Stake-holders: - Government (local) - Government (sub-national) - Individuals or households	Individuals or households	|||	0	1
6714327	Stake-holders: - Civil society (sub-national or local): Local community-based organizations such as Community Sustainable Agriculture and Healthy Environmental Program (CSHEP) - Individuals or households: Smallholder farmers in Kajiado County	Individuals or households	|||	0	1
6714609	Stake-holders: - Adaptation Response 1: - Government (local) - Government (sub-national) - Individuals or householdsAdaptation Response 2:** Cultivating drought-tolerant crop varieties, especially rice - **Stakeholders:** Individuals or households, Government (local) - Adaptation Response 2: - Individuals or households - Government (local)	Individuals or households		0	1
6714743	Stake-holders: - Government (national) - Government (local) - Individuals or households - Other (Nepal Academy of Science and Technology) - Private sector (Corporations and SMEs)	Individuals or households		0	1
6714748	Stake-holders: - Individuals or households - Government (local) - Civil society (sub-national or local)	Individuals or households||| Civil Society- sub-national or local||| Local government	|||	1
6714755	Stake-holders: Not specified	Individuals or households	|||	0		1
6714774	Stake-holders: Individuals or households	Individuals or households	|||	1
6714775	Stake-holders: - Government (local) - Individuals or households	Individuals or households	|||	0	1
6714776	Stake-holders: - Government (local) - Civil society (sub-national or local) - Individuals or households	Sub-national government||| Individuals or households		0	1
6714777	Stake-holders: - Government (national): Zambia, Kenya, Malawi, Nigeria, Ghana, Zimbabwe - Civil society (national): CGIAR Research Program on Climate Change, Agriculture and Food Security (CCAFS) - Farmers (sub-national or local): Farmers in Southern and Eastern Africa	Other	Review - so farms are mentioned but it is a meta-analysis overall|||	0			1
6714778	Stake-holders: Community-based planned adaptation supported by NGOs	Individuals or households||| National government||| Civil Society- international/multinational/national||| Local government||| Civil Society- sub-national or local||| Other	|||Forest Department|||local NGOs	0		1
6714779	Adapting by reducing cultivated land area (ADP_2) Stakeholders**: Individuals or households	Individuals or households		1
6714781	Stake-holders: - Government (national) - Government (sub-national) - Civil society (international, multinational, national)	Individuals or households||| National government||| Local government	|||Farmers	0	1
6714782	Stake-holders: - Government (sub-national): Salim Bakaris - Civil society (sub-national or local) - Individuals or households	Individuals or households||| Local government	"community-level"	0	1
6714783	Stake-holders: - Individuals or households - Civil society (sub-national or local), Government (local) - International or multinational governance institutions (UNDP, IUCN), Government (national) - International or multinational governance institutions (IUCN), Government (national), Civil society (sub-national or local)	Individuals or households||| Other	villagers,forest managers,forest users, current and former executive committee members of community forest user groups (CFUGs); school teachers; members of women's groups, disaster risk reduction (DRR) groups, farmer groups, and indigenous, ethnic, and marginalized groups; and elderly people were identified as key informants|||forest managers, forest user groups, school teachers, members of women…	0	1
6714785	Stake-holders: - Government (sub-national): Wyoming state management practices and policies - Civil society (national): Wyoming Stock Growers Association (WSGA) - Individuals or households: Ranchers who manage the land and livestock - Other: Universities and research institutions	Individuals or households||| Private sector corporations||| Private sector SMEs	|||ranchers	0	1	1
6714786	Stake-holders: Government (national), International or multinational governance institutions, Individuals or households, Private sector (corporations)	National government||| Individuals or households	Inter American development bank.	0	1
6714787	Stake-holders: - Government (local): Water Usersâ€™ Associations, local government departments - Government (sub-national): Department of Irrigation in Maharashtra, Department of Agriculture in Guntur - Civil society (sub-national or local): NGOs collaborating on water management - Individuals or households: Local farmers adopting various water management practices	Individuals or households		0	1
6714789	Stake-holders: - Individuals or households - Government (sub-national) - Civil society (sub-national or local)	Individuals or households		0	1
6714790	Stake-holders: - Individuals or households - Government (local) - Civil society (national)	Individuals or households	|||households|||	0	1
6714791	Stake-holders: - Government (sub-national) and Government (local): Ministries of water, health, fisheries, agriculture, provincial administration, defence, and special programmes provided assistance. - Civil society (international, multinational, national): Red Cross, Action Aid, USAid, Busia Community Development Organization (BUCODEV), United Nations Childrenâ€™s Emergency Fund (UNICEF), and Wo…	Individuals or households	|||	0	1
6714792	Stake-holders: International or multinational governance institutions, Government (national), Government (sub-national), Civil society (international, multinational, national), Individuals or households	Individuals or households		0	1
6714793	Stake-holders: - Government (sub-national) - Individuals or households - International or multinational governance institutions	Individuals or households		0	1
6714796	Stake-holders: Individuals or households, Government (local), Civil society (sub-national or local)	Individuals or households||| Local government	|||	0	1
6714797	Stake-holders: - Government (national) - Individuals or households - Civil society (international) - Government (sub-national/local) - Civil society (sub-national or local)	Individuals or households||| Civil Society- sub-national or local||| Local government||| Sub-national government||| National government	|||	1
6714800	Stake-holders: - Individuals or households: Smallholder farmers undertaking the adaptation - Government (local): Local extension services providing advice - Government (sub-national): Oromia National Regional State under which East Hararghe Zone falls	Individuals or households	smallholder farmers	0	1
6714801	Stake-holders: Individuals or households, Government (local), Government (sub-national), Civil society (sub-national or local)	Individuals or households		0	1
6714802	Stake-holders: - Government (sub-national) - Civil society (sub-national or local) - Individuals or households	Individuals or households||| Civil Society- international/multinational/national	Farmers organisations|||Service providers (water)|||	0	1
6714804	Stake-holders: Individuals or households	Individuals or households	|||	1
6714805	Stake-holders: Individuals or households, Government (local), Civil society (sub-national or local)	Individuals or households		0	1
6714806	Stake-holders: - Civil society (International, multinational, national): Non-governmental organizations (NGOs)	Individuals or households	|||	0	1
6714807	Stake-holders: - International or multinational governance institutions: Africa Rice Center, International Institute of Tropical Agriculture (IITA) - Civil society (international, multinational, national): FAO - Individuals or households: Smallholder farmers in ESA	Individuals or households||| Private sector SMEs		0	1	1
6714808	Stake-holders: - Individuals or households - Civil society (sub-national or local)	Individuals or households		0	1
6714809	Stake-holders: - Individuals or households: Farmers - Government (sub-national): Local Government Areas (LGAs) - Civil society (national): Extension agencies	Individuals or households		0	1
6714810	Stake-holders: - Government (local) - Individuals or households	Individuals or households||| Local government||| Civil Society- sub-national or local||| National government	|||	0		1
6714329	Stake-holders: - Individuals or households: Farmers adapting to climate change - Civil society (local): Kuapa Kokoo Farmers' Union (organization managing the database of farmers) - Civil society (international, multinational, national): Agro-Eco Louis Bolk Institute (managing the Rainforest Alliance database) - Government (national): Ghana Cocoa Board (COCOBOD) providing hybrid cocoa seedlings - …	Individuals or households||| National government		0	1
6714330	Stake-holders: - Government (sub-national) - Government (local) - Civil society (sub-national or local) - Individuals or households - Private sector (corporations)	Individuals or households||| Civil Society- sub-national or local||| Local government||| Private sector SMEs		1
6714331	Stake-holders: - Civil society (sub-national or local) - Government (sub-national), Government (local) - Private sector (SME), Government (sub-national)	Individuals or households||| Civil Society- sub-national or local|||International or multinational governance institutions||| Local government	|||local institutions that facilitated those adaptation strategies	0		1
6714332	Stake-holders: - International or multinational governance institutions: Not directly mentioned - Government (national): Not directly mentioned - Government (sub-national): Ministry of Food and Agriculture (MoFA) - Government (local): Not mentioned explicitly - Private sector (corporations): One private national firm providing tree seedlings - Private sector (SME): Not specified - Civil society (…	Individuals or households||| Civil Society- international/multinational/national||| National government	|||	0	1
6714334	Stake-holders: - Individuals or households - Government (sub-national) - Civil society (sub-national or local)	Individuals or households	|||	0	1
6714336	Stake-holders: Individuals or households, Private sector (SME)	Individuals or households		0	1
6714337	Stake-holders: - Individuals or households - Government (national) - Civil society (sub-national or local) - Government (local)	Individuals or households	|||	0	1
6714338	Stake-holders: - Government (national) - Government (sub-national) - Civil society (international, multinational, national) - Individuals or households	Individuals or households||| Local government		0	1
6714340	Stake-holders: Individuals or households, Government (local)	Individuals or households	smallholder farmers|||	0	1
6714341	Stake-holders: Individuals or Households, Government (local)	Individuals or households	Regional institutions|||Farmers (Cassava Farmers)|||	1
6714342	Stake-holders: - Individuals or households - Civil society (sub-national or local) - Government (local)	Individuals or households	|||farmers	0	1
6714344	Stake-holders: - Government (sub-national) - Government (local) - Individuals or households	Individuals or households||| Local government||| Civil Society- sub-national or local||| Sub-national government	|||	0		1
6714346	Stake-holders: - Private sector (corporations) - Government (national) - Individuals or households - Civil society (national)	Individuals or households||| Private sector SMEs		0	1
6714347	Stake-holders: - Government (national) - Individuals or households	Individuals or households	Smallholder farmers|||	0	1
6714348	Stake-holders: - Individuals or households (Farmers) - Civil society (national) (Expert panel)	Individuals or households		0	1
6714352	Stake-holders: - Individuals or households - Government (local) - Civil society (sub-national or local)	Individuals or households||| Local government	|||peasant farmers	0	1
6714353	Stake-holders: - Individuals or households - Civil society (sub-national or local) - Government (sub-national) - Government (local)	Individuals or households||| Sub-national government||| Local government	Some mention of other actors - extension services|||	0	1
6714354	Stake-holders: Individuals or households, Government (local)	Individuals or households		0	1
6714355	Stake-holders: - Government (national): USDA (United States Department of Agriculture) - Government (sub-national): University of Idaho - Civil society (national): National Agricultural Statistics Services (NASS) - Individuals or households: Wheat farmers in the iPNW	National government||| Private sector SMEs||| Individuals or households	|||	0	1	1
6714357	Stake-holders: - Government (national) - Individuals or households - Government (sub-national)	Individuals or households||| National government||| Civil Society- sub-national or local||| Sub-national government	|||Pastoralists	0		1
6714816	Stake-holders: - Government (national) - Government (sub-national) - Government (local) - Individuals or households	Individuals or households||| National government	|||	1
6714822	Stake-holders: - Individuals or households - Government (national)	Individuals or households||| Private sector SMEs		0	1	1
6714823	Stake-holders: - Central Uganda: Government (local), Private sector (SME), Civil society (international), Individuals or households - Eastern Uganda: Government (local), Private sector (SME), Civil society (international)	Individuals or households		0	1
6714824	Stake-holders: - Government (national) - Individuals or households (Farmers)	Individuals or households	|||	0	1
6714825	Stake-holders: - Government (national) - Government (sub-national) - International or multinational governance institutions - Civil society (national) - Individuals or households	Individuals or households||| National government		0	1
6714826	Stake-holders: - Government (national) - Individuals or households	Individuals or households||| National government||| Local government		1
6714828	Stake-holders: - Individuals or households - Government (sub-national) - Civil society (national) - Other: Research Institutions (International Centre for Integrated Mountain Development - ICIMOD)	Individuals or households	Farmers|||	0	1
6714829	Stake-holders: - Individuals or households: Small-scale coffee farmers - Government (national): The Mexican government - Private sector (corporations): Nestle soluble-coffee factory	Individuals or households||| National government||| Local government	National Water Commission|||National Water Commission|||	0	1
6714830	Stake-holders: - Government (local) - Civil society (sub-national or local) - Individuals or households	Individuals or households	|||review based study	0	1
6714831	Stake-holders: - Government (national) - Civil society (international, multinational, national) - Individuals or households - Government (sub-national) - Civil society (sub-national or local) - Private sector (SME)	Local government||| National government||| Individuals or households||| Civil Society- sub-national or local||| Civil Society- international/multinational/national||| Sub-national government	|||	0	1
6714832	Stake-holders: - Government (national) - Government (local) - Private sector (SME) - Individuals or households (Farmers)	Other	university|||	0			1
6714836	Stake-holders: - Government (national): "Interview participants represented federal and provincial government agencies..." - Government (sub-national): - The CSFSP...Ministry of Agriculture, Government of Saskatchewan (Government of Saskatchewan, 2014) - When the FRWIP was expanded in 2009, the focus became providing producers and municipalities with reliable water sources. - Government (local): …	Individuals or households||| Local government||| National government||| Sub-national government	|||	0	1
6714837	Stake-holders: - Government (local) - Government (sub-national) - Civil society (national or sub-national) - Individuals or households	Individuals or households	Private sector (coorporations)|||	0	1	1
6714838	Stake-holders: - Individuals or households: Smallholder farmers in the selected ejidos. - Civil society (sub-national or local): Formal community associations, such as the ejidos. - Government (national): Mexican government programs like Alianza para el Campo, Alianza Contigo, and SAGARPA offering financial support and adaptation programs. - Other: Regional governmental support and disaster-relie…	Individuals or households||| National government		0	1
6714839	Stake-holders: - Individuals or households - Government (local) - Civil society (sub-national or local)	Individuals or households||| National government||| Civil Society- sub-national or local||| Local government	|||	1
6714841	Stake-holders: - Civil society (international, multinational, national) - Government (sub-national, local) - Government (national) - Individuals or households - Private sector (corporations) - Private sector (SME)	Sub-national government||| National government||| Local government||| Civil Society- sub-national or local	|||	0	1
6714842	Stake-holders: - Individuals or households - Government (local and sub-national) - Government (sub-national)	Individuals or households	|||	0	1
6714843	Stake-holders: - Government (local) - Individuals or households	Individuals or households||| National government||| Civil Society- international/multinational/national	Government and NGOs|||	0		1
6714844	Stakeholders: - Individuals or households - Government (sub-national) - Civil society (local)	Individuals or households	pastoralists|||	0	1
6714848	Stake-holders: - Government (sub-national) - Individuals or households	Individuals or households	|||	0	1
6714850	Stake-holders: - Individuals or Households - Civil Society (Sub-national or Local)	Individuals or households		0	1
6714851	Stake-holders: - Government (sub-national): Village leaders - Civil society (national): District Development Officers, District Forest Officer - Individuals or households: 30 households from each village	Individuals or households		0	1
6714854	Stake-holders: - Government (national) - Government (local) - Civil society (national) - Individuals or households	Individuals or households	|||	0	1
6714855	Stake-holders: - Civil society (sub-national or local) - Individuals or households - Government (local)	Individuals or households||| Civil Society- sub-national or local||| Civil Society- international/multinational/national	|||Civil Society Farmers Org. Public-Private Partnerships. Little reference to Government (rather that their input was lacking)	0		1
6715346	Stake-holders: - Development and use of drought-tolerant seeds and subsidy for farm inputs: Government (local) - Early warning systems for climate events: Government (local) - Construction of drainage canals and river levees: Farmers, Government (local)		|||	0			1
6715347	Stake-holders: - Government (national): The Bangladesh Ministry of Agriculture - Government (sub-national): Department of Agricultural Extension (DAE) - Individuals or households: Farmers in Kalapara sub-district - International or multinational governance institutions: FAO, USAID	National government||| Individuals or households||| Civil Society- sub-national or local||| Local government		0	1	1
6715349	Stake-holders: - Government (sub-national) - Government (local) - Individuals or households	Individuals or households||| Civil Society- sub-national or local		0	1	1
6715350	Stake-holders: - Government (national) - Government (local) - Individuals or Households - Civil society (international, multinational, national)	Sub-national government||| Individuals or households	Farmers	0	1
7851049	Stake-holders: - Government (local) - Individuals or households	Individuals or households		0	1
7851053	Stake-holders: - Government (sub-national): Massachusetts Legislature - Government (local): Municipalities and towns - Individuals or households (farmers)	Individuals or households	Broader community stakeholders	0	1
7851057	Stake-holders: - Government (national): South Africa - Government (sub-national): Limpopo Legislature, Polokwane, South Africa - Civil society (national) - Individuals or households: Small-scale farmers in southern Africa	Individuals or households	|||Farmers	0	1
7851058	Stake-holders: Government (national)	Individuals or households	|||	0	1	1
7851061	Stakeholders: - Civil society (national): Association ANDES - Government (sub-national): Involvement in national policy processes - Civil society (sub-national or local): Quechua communities - Individuals or households: Community farmers in the Potato Park	Civil Society- sub-national or local||| Individuals or households||| Civil Society- international/multinational/national	|||	0	1
7851062	Stake-holders: - Government (national): Swedish Forest Agency (SFA) - Individuals or households: Forest owners - Civil society (national): Forest companies, forest associations	Individuals or households||| National government	|||	0	1
7851065	Stake-holders: - Government (national) - International or multinational governance institutions - Civil society (international, multinational, national)	International or multinational governance institutions	|||	0	1
7851066	Stake-holders: - Government (sub-national): Department of Agrarian Development, MASL (Mahaweli Authority of Sri Lanka), Irrigation Department (ID) - Government (local): Local water managers, system-level officials - Individuals or households: Local farmers and farming communities	Local government||| Individuals or households||| Sub-national government	|||Farmers and relevant offices related to Agriculture sector|||	1
6714345	Stake-holders: - Individuals or Households	Individuals or households||| National government||| Local government	|||	0		1
6714360	Stake-holders: - Government (sub-national) - Individuals or households	Individuals or households		0	1
6714361	Stake-holders: - Rwanda: Government (national), Individuals or households (communities involved in fish breeding), Research institutions - Malawi: Government (national), Individuals or households, Research institutions - Nigeria: Government (national), Individuals or households - South Africa: Government (national), Government (sub-national), Local communities - Mauritius: Government (national) -…	National government||| Private sector SMEs||| Individuals or households|||International or multinational governance institutions||| Local government	|||	0		1
6714362	Stake-holders: - Individuals or households	Individuals or households	|||	1
6714363	Stake-holders: - Individuals or households (farmers) - Government (local - extension officers)	Individuals or households||| National government	Government (national)|||Agricultural Advisors,Representatives of Farmers Union,County Officials	1
6714366	Stake-holders: - Government (national): funded by the Ministry of Minority Affairs, and the government of India - Government (local): community members including small-scale farmers have participated in consultations - Civil society (national): funded by the government and Sadbhavana, the philanthropic wing of the Indian army - Individuals or households: maintenance and monitoring carried out col…	Individuals or households||| Civil Society- sub-national or local|||International or multinational governance institutions||| National government	|||NGO for support	0		1
6714368	Stake-holders: - Individuals or households - Government (local)	Individuals or households||| Private sector SMEs||| Other	tomatoes farmers|||	0	1	1
6714370	Stake-holders: - Government (sub-national): - Stephen Commadeur at Australian Agribusiness Group - Helen Chenoweth and Graeme Anderson at the Victorian Department of Primary Industries - Individuals or households	Individuals or households	|||	0	1
6714371	Stake-holders: - Individuals or households - Government (national) - Civil society (national)	Individuals or households	|||Cucumber farmers	0	1
6714372	Stake-holders: Individuals or households	Individuals or households||| National government|||International or multinational governance institutions	|||	0	1	1
6714373	Stake-holders: - Individuals or households - Government (national)	Individuals or households||| Private sector SMEs||| National government	|||	0		1
6714374	Stake-holders: - Individuals or households - Government (sub-national)	Individuals or households	Community and small scale farmers|||	0	1
6714375	Stake-holders: - Individuals or households - Government (sub-national)	Individuals or households		0	1
6714376	Stake-holders: Individuals or households, Government (national)	Individuals or households||| Sub-national government		1
6714377	Stake-holders: - Government (sub-national) - Civil Society (national) - Individuals or households	Individuals or households	|||	0	1
6714378	**Individuals or households** (Farmers) - **Government (national)** (USDA National Agricultural Statistics Service, USDA-NIFA)	Individuals or households||| Civil Society- sub-national or local	|||	0	1	1
6714379	Stake-holders: - Individuals or households - Government (national)	Individuals or households	|||Famers	0	1
6714380	Stake-holders: - Government (national) - Government (sub-national) - Individuals or households	Individuals or households||| Local government||| National government		1
6714384	Stake-holders: - Individuals or households - Civil society (sub-national or local)	Individuals or households		0	1
6714385	Stake-holders: Individuals or households	Individuals or households	|||	1
6714386	Stake-holders: - Japan, Kazuno: Individuals or households, Government (sub-national) - Japan, Nagano: Government (sub-national), Individuals or households - South Africa, Elgin: Private sector (corporations), Individuals or households	Individuals or households||| Other||| Private sector SMEs	|||Cooperatives|||Research institutes	1
6714387	Stake-holders: - Government (sub-national): Gerson JosÃ© Yunes Antonio, EMATER-RIO, Rio de Janeiro State Department of Agriculture and Livestock, Nova Friburgo, CEP 28613001, Brazil - Government (national): Adriana Maria de Aquino, Embrapa Agrobiology, Ministry of Agriculture and Livestock, Nova Friburgo, CEP 28621450, Brazil - Individuals or households: According to the farmers, the main reason …	Individuals or households||| National government||| Sub-national government		0	1
6714388	Stake-holders: - Government (national) - Government (local) - Civil society (international, multinational, national) - Individuals or households - Civil society (sub-national or local)	Individuals or households||| Civil Society- sub-national or local		0	1
6714389	Stake-holders: - Government (national): Academic institutions, farmers - Government (sub-national): Expert group of the WAFLA Project - Civil society (national): Members of the WAFLA Consortium - Individuals or households: Farmers	Individuals or households||| Local government||| Civil Society- sub-national or local|||International or multinational governance institutions||| Other	|||Academic institutions in each country|||not stated in the paper who is leading each of the initiatives mentioned, however executing them are the farmers.	0		1
6714390	Stake-holders: - Government (local) - Individuals or households	Individuals or households	Farmers|||	0	1
6714391	Stake-holders: - Government (sub-national): Departments responsible for agricultural policies at the state level in Haryana and Bihar. - Government (local): Local governing bodies in the 25 villages (13 in Karnal, 12 in Vaishali). - Agricultural institutions: National and international agricultural development organizations such as the International Maize and Wheat Improvement Center (CIMMYT). - …	Individuals or households||| Civil Society- sub-national or local||| Local government||| National government	|||	0	1	1
6714392	Stake-holders: - Government (national): Policies and investments related to adaptation strategies - Government (sub-national): Sub-national agricultural departments - Individuals or households: Farm households implementing the adaptation strategies - Civil society (national): Research institutions like Pakistan Institute of Development Economics (PIDE) and IDRC - Other: Research Extension Service…	Individuals or households		0	1
6714393	Stake-holders: - Civil society (national): Professional Assistance for Development Action (PRADAN) - Government (sub-national): Various states including Jharkhand, Chhattisgarh, and West Bengal - Individuals or households: Farmers - Government (national): Indian Council for Agricultural Research	Individuals or households	smallholder farmers|||	0	1
6714394	Stake-holders: - Government (sub-national) - Individuals or households - Civil society (sub-national or local)	Individuals or households	|||	0	1
6714397	Stake-holders: - Government (sub-national) - Individuals or households (farmers) - Civil society (sub-national or local) (local watermaster districts)	Individuals or households||| Local government	|||	0	1
6714398	Stake-holders: Farmers, Government (local)	Individuals or households	|||	0	1
6714399	Stake-holders: Individuals or households, Government (sub-national), Government (national), Private sector (corporations), Civil society (international, multinational, national)	Local government||| Individuals or households||| National government	|||farmers	0	1
6714400	Stake-holders: Government (local), Government (sub-national), Civil society (sub-national or local), Individuals or households	Individuals or households||| National government	|||	1
6714401	Stake-holders: - Civil society (international, multinational, national) - Government (sub-national) - Individuals or households - Civil society (sub-national or local)	Individuals or households	adaptation efforts were facilitated and studied by researchers|||	0	1
6714402	Stake-holders: - Government (local) - Civil society (sub-national or local) - Individuals or households - Civil society (national) - International or multinational governance institutions	Individuals or households	|||local communites|||farmers	0	1
6714403	Stake-holders: - Government (national): Uganda Peopleâ€™s Defense Forces (UPDF) - Government (local): Community meetings - Civil society (national): Humanitarian agencies such as NGOs - Individuals or households: Pastoralist households	Individuals or households		0	1
6714404	Stake-holders: - Government (national) - Government (sub-national) - Civil society (international, multinational, national) - Individuals or households	Individuals or households||| National government	CSA stakeholders, including governmental representatives, producers associations, research and academic institutions,and donor organizations,were engaged in the CSAPF process.|||	0	1
6714405	Stake-holders: - International or multinational governance institutions: CGIAR Research Program on Climate Change, Agriculture and Food Security (CCAFS) - Government (sub-national): Local governments in Ethiopia (e.g., Tigray region), - Civil society (international, multinational, national): Deutsche Gesellschaft fÃ¼r Internationale Zusammenarbeit (GIZ) - Individuals or households: Smallholder fa…	Individuals or households		0	1
6714406	Stake-holders: - Government (national) - Government (sub-national) - Private sector (corporations) - Private sector (SME) - Civil society (sub-national or local) - Individuals or households	Individuals or households	community-based organizations|||	0	1
6714408	Stake-holders: - International or Multinational Governance Institutions: International Livestock Research Institute (ILRI) - Private Sector (Corporations): Oromia Insurance Company - Civil Society (National): Humanitarian agencies - Individuals or Households: Pastoralists and agro-pastoralists in the Borena zone	Individuals or households||| Local government||| Private sector corporations||| Civil Society- international/multinational/national|||International or multinational governance institutions	|||Pastoralists & agro-pastoralists	0		1
7851073	Stake-holders: - Government (sub-national) - Government (local) - Individuals or households	Individuals or households	|||farmers in the delta region of the mid-south in the US	0	1
7851074	Stake-holders: - Government (local) - Private sector (SME) - Civil society (sub-national or local) - Individuals or households	Individuals or households	|||	0	1
7851075	Stake-holders: - Government (national): United States Department of Agriculture (USDA) Farm Service Agency (FSA) - Government (local): FSA field staff operating in county and state offices - Individuals or households: Farmers and ranchers receiving the adaptation support	National government||| Private sector corporations||| Sub-national government		0	1	1
7851076	Stake-holders: - Government (national) - Government (sub-national) - Government (local) - Individuals or households	Local government||| Individuals or households||| Civil Society- sub-national or local	|||	0		1
7851080	Stake-holders: - Government (national) - Government (sub-national) - Government (local) - Civil society (sub-national or local) - Individuals or households	Individuals or households	|||farmers	0	1
7851081	Stake-holders: - Individuals or households - Government (local)	Individuals or households		0	1
7851083	Stake-holders: Individuals or households	International or multinational governance institutions||| Individuals or households||| Private sector SMEs	|||small holder farmers	0		1
7851084	Stake-holders: - Individuals or households - Government (local)	Individuals or households		0	1
7851085	Stake-holders: - Government (local): Farmers in Andhra Pradesh and Telangana - Government (sub-national): State governments of Andhra Pradesh and Telangana - International or multinational governance institutions: Ministry of Foreign Affairs and the Royal Norwegian Embassy - Civil Society (international): Norwegian Institute of Bioeconomy Research - Civil Society (national): International Water M…	Individuals or households||| National government||| Sub-national government||| Civil Society- international/multinational/national|||International or multinational governance institutions||| Local government	A project titled "CLIMADAPT" funded by Norwegian Embassy in India	1
7851088	Stake-holders: Individuals or households	Individuals or households||| Civil Society- international/multinational/national	|||Academia|||	0		1
7851090	Stake-holders: - Civil society (international, multinational, national): Various health organizations - Government (national): Health authorities, meteorological authorities - International or multinational governance institutions: United Nations Development Program - Private sector (corporations): Microsoft - Government (local): Local traditional/administrative leaders - Individuals or household…	Individuals or households||| Civil Society- international/multinational/national||| National government||| Sub-national government||| Civil Society- sub-national or local	|||Farmers, extension agents|||, NGOs and researchers|||media|||smallholder farmers	1
7851091	Stake-holders: - Government (national) - Civil society (international, multinational, national) - Civil society (sub-national or local) - Individuals or households	Individuals or households|||International or multinational governance institutions||| Local government		0	1	1
7851092	Stake-holders: Individuals or households	Individuals or households||| Civil Society- sub-national or local	Farmer cooperatives	0		1
7851094	Stake-holders: - Government (national): Department of Water Resources Engineering, Thai Royal Irrigation Department (RID), Thai Meteorological Department (TMD) - Government (sub-national): Local irrigation projects such as Naraesuan Dam Operation and Maintenance Project, Plaichumpol Operation and Maintenance Project, Dongsatti Operation and Maintenance Project, Thabua Operation and Maintenance Pr…	Civil Society- sub-national or local||| Civil Society- international/multinational/national	|||	1
7851098	Stake-holders: - Government (sub-national): Agricultural extension offices in Indian states - Civil society (International, multinational, national): International Crop Research Institute for Semi-Arid Tropics (ICRISAT) - Individuals or households: Rural farm households	Individuals or households	farmers|||	0	1
7851099	Stake-holders: - Small-scale farmers - Commercial farmers - Government (local)	Individuals or households||| Other	commercial farmers, traditional farmers|||	0	1
7851102	Stake-holders: - Government (sub-national) - Individuals or households - Civil society (sub-national or local)	Individuals or households||| National government||| Sub-national government||| Local government||| Private sector corporations		0	1	1
7851103	Stake-holders: - Government (local) - Civil society (sub-national or local) - Individuals or households	Individuals or households||| Civil Society- sub-national or local	|||	0	1
7851104	Stake-holders: - Government (local) - Civil society (national) - Individuals or households	Individuals or households||| National government	|||	0	1
7851105	Stake-holders: - Individuals or households - Government (national) - Government (sub-national) - Civil society (national)	Individuals or households		0	1
7851107	Stake-holders: Individuals or households	Individuals or households		1
7851109	Stake-holders: - Farmers (Individuals or households) - Government (national) - Government (sub-national) or local entities - Private Sector (SME) - Civil society (national/international)	Individuals or households||| National government||| Civil Society- sub-national or local||| Other	Farms|||FRIS provided by USDA's data set information	0	1
7851112	Stake-holders: - Civil society (national) - Individuals or households - Government (local) - Civil society (international, multinational, national)	Individuals or households||| Civil Society- sub-national or local	Local knowledge: 'They go on to argue that ÃƒÂ¢Ã¢â€šÂ¬Ã‹Å“ÃƒÂ¢Ã¢â€šÂ¬Ã‹Å“climate change adaptation needs to forge an honest and creative deliberative approach that both can be more democratic and can yield genuine benefits for the process of societal adaptation''ÃƒÂ¢Ã¢â€šÂ¬Ã¢â‚¬Âthough recognizing that sometimes climate adaptation decisions require expert intervention because of possible limited…	0	1
7851115	Stake-holders: Individuals or households, government (local), government (national), civil society (sub-national or local), civil society (international, multinational, national)	Individuals or households||| Civil Society- sub-national or local	|||fisheries programs (as sub national civil society)	0	1
6714409	Stake-holders: - Private sector (SME) - Government (sub-national) - Government (local) - Individuals or households - Civil society (national)	Individuals or households||| Other	The survey was disseminated by email, newsletters and online media through forest owners' associations and organisations active in the forest sector|||Forest owners and managers (both public and private))	0	1
6714411	Stake-holders: - Individuals or households - Civil society (sub-national or local) - Civil society (national) - Government (local) - Government (sub-national) - International or multinational governance institutions	Individuals or households||| National government||| Civil Society- sub-national or local	District Level Agriculture Office|||	0	1
6714412	Stake-holders: Government (national), Government (sub-national), Civil society (national), Civil society (sub-national or local), Individuals or households	Civil Society- sub-national or local||| Individuals or households||| Local government||| National government||| Civil Society- international/multinational/national	|||	1
6714413	Stake-holders: - Individuals or households - Government (sub-national and local)	Individuals or households||| National government||| Civil Society- sub-national or local	|||Extension officers|||Farmer based organisations	0		1
6714414	Stake-holders: - Civil society (local) - Individuals or households	Local government||| Individuals or households	Small holder farmers|||	0	1	1
6714415	Stake-holders: - Civil society (national): ADHENO Integrated Rural Development Association - Government (local): Local government authority in the two kebeles - Individuals or households: Smallholder farmers in the Goshebado and Metkoriya kebeles	Civil Society- sub-national or local||| Individuals or households	|||ntegrated Rural Development Association|||"To address questions (a) and (b), our study and results are based on 449 household surveys, collected between June and August 2017, in two rural kebeles in Ethiopia in which ADHENO has been active since 2003. "	0	1
6714417	Stake-holders: - Individuals or households (Potato farmers) - Government (local) (Local extension services agencies) - Civil society (national) (NGOs providing extension services)	Individuals or households	|||Farmers|||farmers	0	1
6714418	Stake-holders: - Estate managers employed by Regional Plantation Companies (Private sector - corporations) - Government (national) - Government (sub-national)	Private sector SMEs||| Private sector corporations	Tea plantation managers	0	1
6714420	Stake-holders: - Individuals or households - Government (local) - Civil society (international, multinational, national)	Local government||| Individuals or households	Rural farmers|||rural communities	0	1
6714421	Stake-holders: - Individuals or households - Government (local) - Civil society (international, multinational, national)	Individuals or households	|||	0	1
6714422	Stake-holders: - Government (local) - Individuals or households	Individuals or households		0	1
6714423	Stake-holders: - Government (sub-national): Extension Officers and County Officials in Ã–stergÃ¶tland, Sweden, and Uusimaa, Finland - Civil society (national): Agricultural advisors and representatives of farmers' unions - Individuals or households: Farmers (both organic and conventional)	Individuals or households||| Local government||| Sub-national government||| Civil Society- sub-national or local	|||agricultural experts|||agricultural experts|||	1
6714424	Stake-holders: Individuals or households, Government (sub-national), Civil society (sub-national or local)	Individuals or households	|||Extension agents|||	0	1
6714425	Stake-holders: - Government (national) - Government (sub-national) - Individuals or households	Individuals or households||| National government||| Sub-national government||| Civil Society- sub-national or local||| Private sector SMEs||| Civil Society- international/multinational/national||| Local government	|||	0		1
6714426	Stake-holders: - Individuals or households - Government (local) - Private sector (SME) - Government (national)	Individuals or households		0	1
6714427	Stake-holders: - Government (national) - Government (local) - Private Sector (Corporations) - Private Sector (SME) - Individuals or households - Civil society (sub-national or local)	Other||| Individuals or households	farmers|||	0	1
6714428	Stake-holders: Individuals or households, Government (local), Civil society (sub-national or local)	Individuals or households||| National government	|||	0	1
6714429	Stake-holders: - Individuals or households - Civil society (sub-national or local)	Individuals or households	|||	0	1
6714432	Stake-holders: - Individuals or households - Government (local) - Civil society (local) - Government (sub-national)	Individuals or households||| Local government	|||	0	1
6714433	Stake-holders: Individuals or households	Individuals or households		1
6714434	Stake-holders: Individuals or households, Government (local), Civil society (sub-national or local)	Individuals or households	|||Cocoyam farmers|||	0	1
6714435	Stake-holders: - Government (sub-national): Yobe State Agricultural Development Programme (YSADP) - Individuals or households: Smallholder farmers (both male-headed and female-headed households)	Individuals or households		0	1
6714436	Stake-holders: - Government (local) - Individuals or households	Individuals or households||| Local government||| National government		1
6714439	Stake-holders: - Government (local): The AsociaciÃ³n Barillense de Agricultores (ASOBAGRI) - Civil society (sub-national or local): The AsociaciÃ³n Barillense de Agricultores (ASOBAGRI) - Private sector (SME): Respondent 12 - Individuals or households	Individuals or households||| Sub-national government||| Civil Society- sub-national or local	Regional coffee Cooperatives and coffee small holder farmers|||	0	1
6714443	Stake-holders: Not specified	Individuals or households	|||	0		1
6714445	Stake-holders: - Government (sub-national): Ghana's Ministry of Food and Agriculture - Government (local): Local farming communities in the selected districts - Private sector (corporations): Contractual brokers, processing companies, marketing boards - Civil society (sub-national or local): NGOs, farmer-based organizations (FBOs) - Individuals or households: Crop farmers in the northern region o…	Individuals or households||| Private sector SMEs||| Local government||| Civil Society- sub-national or local||| National government	National government|||	1
6714447	Stake-holders: Individuals or households (small-scale farmers), Government (local) [community groups and agriculture extension agents]	Individuals or households||| Civil Society- sub-national or local||| National government	|||	0		1
6714448	Stake-holders: - Government (sub-national): Domestic, sub-national governing unit - Civil society (sub-national or local): Formal community associations - Individuals or households: Including informal community networks	Individuals or households		0	1
6714449	Stake-holders: - Government (national) - Government (local) - Individuals or households - Private sector (corporations)	Individuals or households||| National government||| Local government||| Other	|||Local farmers	0	1
6714451	Stake-holders: - Government (sub-national): households willing to participate, corresponding to a range between 30 and 100% of the local population, totaling 193 households surveyed - Civil society (national): NGOs involved include PROINPA, CARE, and Samaritan's Purse - Individuals or households: Farmers in eight Aymara communities actively engaged in adaptation practices	Individuals or households	|||	0	1
6714529	Stake-holders: - Government (local): Local government provided technical and financial support. - Government (sub-national): Research and technical assistance from sub-national sources. - Government (national): National policies and frameworks guiding adaptation. - Individuals or households: Local herders implementing adaptation practices. - Civil society (sub-national or local): Local communitie…	Local government||| Individuals or households||| Civil Society- sub-national or local	|||	1
6714531	Stake-holders: - Government (sub-national) - Government (local) - Individuals or households - Civil society (sub-national or local)	Individuals or households	|||	0	1
6714533	Stake-holders: - For Conservation Agriculture: Government (Sub-national), Individuals or households, Civil society (national) - For On-farm water harvesting: Individuals or households, Civil society (national) - For Maintaining soil moisture: Individuals or households, Civil society (national)	Individuals or households	|||	0	1
6714536	Stake-holders: Individuals or households, Government (local)	Individuals or households||| Civil Society- sub-national or local	|||agricultural extension worker (could be either government or NGO)	0	1	1
6714537	Stake-holders: - Individuals or Households - Government (local)	Individuals or households||| Civil Society- international/multinational/national|||International or multinational governance institutions||| Other	|||Farmers|||	0	1	1
6714539	Stake-holders: - Government (local) - Government (sub-national) - NGOs - Individuals or households - Civil society (local) - Womenâ€™s group - One input provider	Individuals or households||| National government||| Civil Society- international/multinational/national||| Private sector corporations||| Civil Society- sub-national or local||| Private sector SMEs		0		1
6714540	Stake-holders: - Government (sub-national) - Civil society (sub-national or local) - Government (local)	Individuals or households	|||	0	1
6714541	Stake-holders: Individuals or households, Government (local), Government (national), Civil society (national)	Individuals or households		0	1
6714542	Stake-holders: - Government (local) - Civil society (national) - Individuals or households	Individuals or households||| Civil Society- sub-national or local		0	1
6714544	Stake-holders: Individuals or households, Government (local), Government (sub-national)	Individuals or households	|||	0	1
6714545	Stake-holders: - Government (National): Ministry of Agriculture and Livestock, Zambia - Civil society (National): World Vision, Care International, Conservation Farming Unit (CFU), Zambia National Farmers Union (ZNFU) - Private sector (Corporations): Pannar, Monsanto, Zamseed	National government||| Civil Society- international/multinational/national||| Private sector corporations||| Local government||| Individuals or households	|||	0		1
6714546	Stake-holders: - Government (local) - Civil society (sub-national or local) - Individuals or households	Individuals or households		0	1
6714549	Stake-holders: - Individuals or households: Forest owners - Civil society (national): Swedish Forest Agency - Government (national): Possibly implied involvement - Private sector (SME): Small-scale, non-industrial forest owners	Individuals or households	private, non-industrial forest owners in Sweden|||private forest owners	0	1
6714551	Stake-holders: - Government (local): Local leaders and Nambardar (village headman nominated by the government) - Civil society (sub-national or local): Local Farmerâ€™s Organizations (FOs) - Private sector (corporations): Agricultural Service Providers (ASPs) - Individuals or households: Farmers practicing CSA - Government (sub-national): Punjab government's involvement in developing subsidies an…	Individuals or households||| Private sector corporations		0	1
6714553	Stake-holders: Individuals or households, Government (local), Civil society (sub-national or local)	Individuals or households		0	1
6714554	Stake-holders: - Government (local): The role of local agricultural officers and commune centers in the survey and adaptation processes. - Individuals or households: Farmers and farm households implementing the adaptation measures.	Individuals or households		0	1
6714555	Stake-holders: - Government (national) - Civil society (national) - Individuals or households	Individuals or households||| National government||| Sub-national government||| Local government		0	1
6714556	Stake-holders: - Government (sub-national) - Civil society (sub-national or local) - Individuals or households - Private sector (SME)	Individuals or households		0	1
6714557	Stake-holders: - Individuals or Households - Government (sub-national)	Individuals or households	|||	0	1
6714558	Stake-holders: - Individuals or households (including informal community networks) - Government (local) - Civil society (sub-national or local)	Individuals or households||| National government||| Local government	|||	0	1
6714559	Stake-holders: Individuals or households, Civil society (sub-national or local)	Individuals or households||| National government	National Goverment|||	0	1	1
6714561	Stake-holders: - Government (national) - Civil society (international, multinational, national) - Individuals or households	Individuals or households||| Civil Society- sub-national or local	Farmers|||private or public institutions	0	1
6714564	Stake-holders: Individuals or households	Individuals or households		1
6714565	Stake-holders: Individuals or households	Individuals or households	|||	1
7851139	Stake-holders: - Individuals or Households - Government (local) - Civil society (sub-national or local)	Individuals or households||| National government	|||	0	1
7851141	Stake-holders: - Individuals or households - Government (sub-national)	Individuals or households		0	1
7851149	Stake-holders: - Government (local): Local elected village units (panchayats) - Civil society (international, multinational, national): Non-governmental organizations (NGOs) - Individuals or households: Local farmers and households	Individuals or households||| Sub-national government||| Civil Society- sub-national or local	others may be involved - unsure since not able to access article's full text|||	1
7851150	Stake-holders: - Government (sub-national) - Civil society (sub-national or local) - Individuals or households	Individuals or households||| Local government||| National government	|||	0	1
7851151	Stake-holders: - Individuals or households - Government (sub-national) - Civil society (sub-national or local)	Individuals or households		0	1
7851153	Stake-holders: - Individuals or households - Government (local) - Civil society (international, multinational, national)	Individuals or households||| Private sector SMEs||| Local government||| Civil Society- sub-national or local		0		1
7851156	Stake-holders: Individuals or households, Civil society (local), Government (sub-national)	Individuals or households		0	1
7851157	Stake-holders: - Government (sub-national), Civil society (international, multinational, national) - Civil society (international, multinational, national), Civil society (sub-national or local) - Government (sub-national), Individuals or households	Individuals or households		0	1
6714409	Stake-holders: - Civil society (national): Forest ownersâ€™ associations - Government (sub-national): Public forest managers - Private sector (SME): Private forest owners who manage smaller plots - Individuals or households: Private forest owners	Individuals or households||| Other	The survey was disseminated by email, newsletters and online media through forest owners' associations and organisations active in the forest sector|||Forest owners and managers (both public and private))	0		1
6714411	Stake-holders: - Individuals or households - Civil society (national) - Government (local) - Government (national)	Individuals or households||| National government||| Civil Society- sub-national or local	District Level Agriculture Office|||	1
6714412	Stake-holders: - Government (national) - Government (sub-national) - Government (local) - Individuals or households	Civil Society- sub-national or local||| Individuals or households||| Local government||| National government||| Civil Society- international/multinational/national	|||	0		1
6714413	Stake-holders: Individuals or households, Government (sub-national), Government (national), Civil society (international, multinational, national) - USAID	Individuals or households||| National government||| Civil Society- sub-national or local	|||Extension officers|||Farmer based organisations	1
6714414	Stake-holders: - Individuals or households - Government (local) - Civil society (sub-national or local)	Local government||| Individuals or households	Small holder farmers|||	0	1
6714415	Stakeholders: Civil society (national), Government (local)	Civil Society- sub-national or local||| Individuals or households	|||ntegrated Rural Development Association|||"To address questions (a) and (b), our study and results are based on 449 household surveys, collected between June and August 2017, in two rural kebeles in Ethiopia in which ADHENO has been active since 2003. "	0	1	1
6714417	Stake-holders: Individuals or households	Individuals or households	|||Farmers|||farmers	1
6714418	Stake-holders: - Private Sector (Corporations): Large national companies that manage the tea estates. - Government (national) & Government (sub-national): The Ministry of Plantation Industries, historical management under JEDB and SLSPC. - Individuals or Households: Estate managers and potentially estate resident workers.	Private sector SMEs||| Private sector corporations	Tea plantation managers	0	1
6714420	Stake-holders: Individuals or households (including informal community networks), Government (local), Civil society (sub-national or local)	Local government||| Individuals or households	Rural farmers|||rural communities	0	1
6714421	Stake-holders: - Government (sub-national) - Individuals or households - Government (local)	Individuals or households	|||	0	1
6714422	Stake-holders: - Government (local): District Agriculture Development Office (DADO) - Individuals or households: Farmers in Makwanpur district - Civil society (sub-national or local): Organizations like agriculture cooperatives, saving and credit groups, and livestock groups	Individuals or households		0	1
6714423	Stake-holders: - Government (sub-national): Domestic sub-national governing unit such as county officials - Individuals or households: Farmers as individuals or households implementing practices on their own land	Individuals or households||| Local government||| Sub-national government||| Civil Society- sub-national or local	|||agricultural experts|||agricultural experts|||	0		1
6714424	Stake-holders: - Government (national and sub-national) - Civil society (national) - Government (local) - Individuals or households	Individuals or households	|||Extension agents|||	0	1
6714425	Stake-holders: - Government (national) - Government (local) - Civil society (local) - Individuals or households	Individuals or households||| National government||| Sub-national government||| Civil Society- sub-national or local||| Private sector SMEs||| Civil Society- international/multinational/national||| Local government	|||	0		1
6714426	Stake-holders: - Government (sub-national): Department of Fisheries (DOF) - Government (local) - Private sector (SME) - Individuals or households - Civil society (sub-national or local)	Individuals or households		0	1
6714427	Stake-holders: - Government (national) - Government (local) - Private sector (corporations) - Civil society (sub-national or local) - Individuals or households	Other||| Individuals or households	farmers|||	0	1
6714428	Stake-holders: - Individuals or households - Government (local) - Government (sub-national)	Individuals or households||| National government	|||	1
6714429	Stake-holders: - Individuals or households: Farmers - Government (sub-national): Local authorities - Private sector (SME): Small enterprises	Individuals or households	|||	0	1
6714432	Stake-holders: - Government (sub-national) - Individuals or households - Civil society (sub-national or local)	Individuals or households||| Local government	|||	0	1
6714433	Stake-holders: - Individuals or households - Shrimp farmers - Government (sub-national)	Individuals or households		0	1
6714434	Stake-holders: Individuals or households	Individuals or households	|||Cocoyam farmers|||	1
6714435	Stake-holders: - Individuals or households - Government (sub-national): Yobe State Agricultural Development Programme - Other (supporting entities): Asian Institute of Technology (AIT), International Tropical Timber Organization (ITTO), West African Research Center (WARC), International Federation of University Women (IFUW)	Individuals or households		0	1
6714436	Stake-holders: - Adaptation Response 1: Government (sub-national) and Individuals or households - Adaptation Response 2: Individuals or households and Government (sub-national) - Adaptation Response 3: Individuals or households - Adaptation Response 4: Government (sub-national)	Individuals or households||| Local government||| National government		1
6714439	Stake-holders: - Government (national): References to funding and support from CGIAR - Civil society (international, multinational, national): CGIAR (specifically the research program on Climate Change, Agriculture and Food Security (CCAFS)) - Civil society (sub-national or local): AsociaciÃ³n Barillense de Agricultores (ASOBAGRI) - Individuals or households: Smallholder farmers engaging in the i…	Individuals or households||| Sub-national government||| Civil Society- sub-national or local	Regional coffee Cooperatives and coffee small holder farmers|||	0		1
6714443	Stake-holders: Not provided	Individuals or households	|||	0		1
6714445	Stake-holders: - Government (National) - Civil society (National and International) - Individuals or households	Individuals or households||| Private sector SMEs||| Local government||| Civil Society- sub-national or local||| National government	National government|||	0		1
6714447	Stake-holders: - Individuals or households - Government (local)	Individuals or households||| Civil Society- sub-national or local||| National government	|||	0		1
6714448	Stake-holders: Individuals or households, Government (local)	Individuals or households		0	1
6714449	Stake-holders: Individuals or households, Government (local), Private sector (corporations)	Individuals or households||| National government||| Local government||| Other	|||Local farmers	0	1
6714451	Stake-holders: - Individuals or households - Government (local) - Civil society (local)	Individuals or households	|||	0	1
6714529	Stake-holders: - Government (sub-national) - Civil society (sub-national or local) - Individuals or households - Government (local)	Local government||| Individuals or households||| Civil Society- sub-national or local	|||	1
6714531	Stake-holders: - Individuals or households - Government (sub-national) - Civil society (sub-national or local)	Individuals or households	|||	0	1
6714533	Stake-holders: - Individuals or households: Farmers adopting CA practices. - Civil society (national): Extensions services and research institutions involved in CA training and support. - Government (sub-national): Local government support in farm diversification and irrigation practices.	Individuals or households	|||	0	1
6714536	Stake-holders: - Individuals or households - Government (local) - Civil society (sub-national or local)	Individuals or households||| Civil Society- sub-national or local	|||agricultural extension worker (could be either government or NGO)	0	1
6714537	Stake-holders: - Government (local) - Government (sub-national) - Government (national) - Civil society (national) - Individuals or households - Civil society (local)	Individuals or households||| Civil Society- international/multinational/national|||International or multinational governance institutions||| Other	|||Farmers|||	0		1
6714550	Stake-holders: - Tanzania Meteorological Agency - Village Executive Officers (VEOs), Ward Executive Officers (WEOs) - Local community members - Norwegian Programme for Capacity Development in Higher Education and Research for Development (NORHED) - Village councils in Micheweni District and Mkoani District - Local government authorities - Private sector (corporations): SMEs and agricultural input…	Individuals or households	|||	0	1
6714567	Stake-holders: - Individuals or households - Government (sub-national) - Government (local) - Civil society (local)	Individuals or households||| Private sector SMEs||| Civil Society- sub-national or local||| Local government||| National government		0		1
6714568	Stake-holders: Individuals or households	Individuals or households		1
6714569	Stake-holders: - Individuals or households	Individuals or households	goverment institution|||	0		1
6714416	Stake-holders: - Private sector (corporations) - Farmers - Civil society (local) - Educational institutions (part of the Chamber of Agriculture)	Individuals or households||| Sub-national government|||International or multinational governance institutions||| Local government||| Private sector SMEs||| Private sector corporations||| Other||| Civil Society- sub-national or local||| Civil Society- international/multinational/national	Research|||Research Institutions|||Farmers	0		1
6714437	Stake-holders: Individuals or households, Government (local), Civil society (local)	Individuals or households	|||fisherman	0	1
6714438	Stake-holders: - International or multinational governance institutions - Government (national) - Government (sub-national / local) - Civil society (national) - Individuals or households	International or multinational governance institutions||| Local government||| National government||| Individuals or households	|||Diverse recipients of project funding|||Global Environment Facility (GEF)	0	1
6714440	Stake-holders: - Government (national) - Private sector (SME) - Civil society (national) - Individuals or households	Individuals or households	|||	0	1
6714441	Stake-holders: - Government (sub-national) - Private sector (corporations) - Civil society (sub-national or local) - Individuals or households	Individuals or households||| Private sector SMEs||| Civil Society- sub-national or local	|||	0	1
6714452	Stake-holders: Individuals or households, Government (national)	Individuals or households	|||	0	1
6714453	Stake-holders: - Government (national) - Government (sub-national) - Government (local) - Individuals or households	Local government||| Sub-national government||| National government||| Private sector corporations||| Private sector SMEs||| Civil Society- sub-national or local	|||Partnership- "The analysis is part of a governance research project undertaken under the Partnership for Canada-Caribbean Community Climate Change Adaptation (ParCA)."|||	0		1
6714454	Stake-holders: - Climate Information Services (CIS): Government (national), Civil society (national) - Zai and half-moon techniques: Individuals or households, Government (local), Civil society (local)	Individuals or households||| National government||| Other	|||Researchers|||Researchers (Local and International)	0	1
6714455	Stake-holders: - Government (national) - International or multinational governance institutions - Government (sub-national) - Civil society (international, multinational, national)	Civil Society- international/multinational/national||| National government||| Local government||| Civil Society- sub-national or local|||International or multinational governance institutions	|||	1
6714456	Stake-holders: - Government (national) - Government (local) - Individuals or households	Individuals or households	farmers|||Farmers	0	1
6714458	Stake-holders: - Government (national) - Government (sub-national) - Government (local) - Private sector (corporations) - Private sector (SME) - Individuals or households	Individuals or households||| National government||| Private sector corporations||| Private sector SMEs	|||	1
6714459	Stake-holders: Government (sub-national), Individuals or households	Individuals or households||| Local government	|||collective action within the farming community|||Collective action in the farming community	1
6714460	Stake-holders: - Government (sub-national) - Individuals or households	Individuals or households||| Local government		1
6714461	Stake-holders: Individuals or households	Individuals or households||| Local government	|||	0		1
6714463	Stake-holders: Individuals or households, Government (local)	Individuals or households	|||	0	1
6714464	Stake-holders: - Government (local): Engages by implementing policies to support adaptation strategies for farming communities. - Civil society (national): NGOs and local organizations help disseminate information and support farming communities in adaptation efforts. - Individuals or households: Farmers themselves who adapt by changing their cultivation practices and seeking diversified income s…	Individuals or households		0	1
6714465	Stake-holders: - Government (local): Local village elders - Civil society (national): Farmer Co-op - Individuals or households: Individual farmers within the cooperative	Civil Society- international/multinational/national||| Civil Society- sub-national or local||| Individuals or households	cooperatives|||	0	1
6714466	Stake-holders: - Government (national) - Government (sub-national) - Individuals or households - Civil society (local)	National government||| Individuals or households	|||	0	1
6714469	Stake-holders: Individuals or households	Individuals or households	|||	1
6714470	Stake-holders: - Intensification of Irrigation: - Individuals or households - Integration of Livestock Production: - Individuals or households - Changes in Tillage Practices: - Individuals or households - Application of Fertiliser and Other Inputs on Farms: - Individuals or households - Shift from Agriculture to Non-Farm Jobs: - Individuals or households - Seasonal Migration: - Individuals or hou…	Individuals or households||| Local government||| Civil Society- sub-national or local||| National government	traditional chief|||Experts (planning ofÃƒÂ¯Ã‚Â¬Ã‚Âcers at the districts)|||	0		1
6714471	Stake-holders: - Government (national): Philippine Department of Agriculture â€“ Bureau of Agricultural Research - Individuals or households: Farmer-respondents - Civil society (sub-national or local): Farmer-to-farmer extension activities	Individuals or households	|||	0	1
6714472	Stake-holders: - Government (local) - Government (sub-national) - Individuals or households	International or multinational governance institutions||| Sub-national government	Regional livestock systems|||	0	1	1
6714474	Stake-holders: - Government (national) - Government (sub-national) - Government (local) - Individuals or households	Individuals or households||| National government||| Private sector SMEs||| Private sector corporations||| Local government||| Sub-national government	|||	0		1
6714475	Stake-holders: - Individuals or households: Smallholder farmers adapting at farm level - Civil society (sub-national or local): Social networks within farming communities share knowledge and support adaptation	Individuals or households	|||	0	1
6714477	Stake-holders: - Government (national) - Government (sub-national) - Civil society (sub-national or local) - Individuals or households	Individuals or households	|||	0	1
6714478	Stake-holders: Individuals or Households, Civil Society (Sub-national or local)	Individuals or households||| Local government	|||Chief, elders	0		1
6714479	Stake-holders: - Individuals or households - Civil society (international, multinational, national) - Government (sub-national)	Individuals or households	|||Farmers|||farmers	0	1
6714480	Stake-holders: Individuals or households	Individuals or households	|||	1
6714481	Stake-holders: Individuals or households, Government (national), Civil society (international, multinational, national)	Individuals or households	|||	0	1
6714482	Stake-holders: - **Stakeholders:** Government (sub-national), Civil society (national) - **Stakeholders:** Government (local), Individuals or households	Individuals or households||| Civil Society- sub-national or local||| Sub-national government||| National government||| Civil Society- international/multinational/national	|||	1
6714483	Stake-holders: - Civil society (international, multinational, national): IFAD, CARE, Save the Children - Civil society (sub-national or local): Local community farmers - Individuals or households: Farmers' households - Government (local): Local government agriculture service and local extension service - International or multinational governance institutions: FAO	Individuals or households	|||	0	1
6714484	Stake-holders: Individuals or households, Government (sub-national)	Individuals or households	|||Farmers	0	1
6714485	Stake-holders: Individuals or households	Individuals or households	|||	1
6714486	Stake-holders: - Individuals or households - Civil society (sub-national or local) - Government (local)	Individuals or households		0	1
6714487	Stake-holders: - Individuals or households - Government (national) - Civil society (national)	Individuals or households||| National government||| Civil Society- sub-national or local		1
6714489	Stake-holders: - Individuals or households - Government (sub-national) - Civil society (sub-national or local) - Government (national) - Civil society (national)	Individuals or households	|||	0	1
6714490	Stake-holders: - Government (national) - Government (sub-national) - Civil Society (national) - Individuals or households	Individuals or households||| National government||| Sub-national government||| Local government||| Other	|||Farmers- Farm households|||farmers	0	1
6714491	Stake-holders: - Individuals or households - Civil society (sub-national or local) - Government (national) - Civil society (international, multinational, national)	National government||| Local government||| Civil Society- international/multinational/national||| Individuals or households	No others mentioned: multiple sites|||smallholder farmers	1
6714492	Stake-holders: - Government (national) - Government (local) - Civil Society (national) - Individuals or households	Sub-national government||| Individuals or households	|||	0	1
6714494	Stake-holders: Government (sub-national), Government (local), Civil society (sub-national or local), Individuals or households	Individuals or households	|||	0	1
6714497	Stake-holders: - Saving through Cattle Ranching: - Individuals or Households - Diversification through Off-farm Jobs and Provision Shops: - Individuals or Households - Other Stakeholders: - Government (sub-national)	Individuals or households||| Local government||| Civil Society- international/multinational/national||| National government	|||	0		1
6714498	Stake-holders: - Government (sub-national) - Individuals or Households - Government (local) - Civil society (local) - Other: Agricultural extension services	Individuals or households	|||	0	1
6714530	Stake-holders: Government (national), Government (sub-national), Individuals or households	Individuals or households||| Local government||| Civil Society- sub-national or local||| Sub-national government	mention government policies as important and therefore relevant as an actor impacting adaptation|||	0		1
6714499	Stake-holders: Individuals or households	Individuals or households||| Civil Society- international/multinational/national|||International or multinational governance institutions	|||	0		1
6714500	Stake-holders: - Government (national): ComisiÃ³n Nacional Forestal (CONAFOR) (Mexico) - Government (local): Ejidal community in Ichamio (Mexico), Municipality of Fogars de MontcluÌs (Spain) - Individuals or households: Local inhabitants and farmers (Mexico), Farmers adapting water storage techniques and livestock practices (Spain), Local businesses involved in tourism and recreational services …	Individuals or households||| Civil Society- sub-national or local||| Other||| Local government||| National government	|||land owners and managers|||Because our sampling frame was of owners and managers of land, the mean age of respondents was 62 in Ichamio, and 56 in Fogars de MontcluÃƒâ€šÃ‚Â´s.|||Land-users|||	0		1
6714501	Stake-holders: - Government (national) - Government (local) - Individuals or households	Individuals or households||| National government||| Private sector corporations	|||	0		1
6714503	Stake-holders: - Government (national) - Government (sub-national) - Government (local) - Individuals or households - Civil society (sub-national or local)	Individuals or households||| Civil Society- sub-national or local	Local Goverment|||detail of individuals mentioned in table3|||	1
6714504	Stake-holders: - International or multinational governance institutions - Civil society (international, multinational) - Government (national) - Individuals or households - Government (sub-national)	Individuals or households||| Civil Society- international/multinational/national		0	1
6714505	Stake-holders: - Individuals or households - Civil society (sub-national or local) - Government (national)	Individuals or households	|||	0	1
6714506	Stake-holders: - Government (national): The national government initiated the row planting campaign through the Agricultural Transformation Agency (ATA). - Government (local): Local governments were also involved through the Farmer Training Centers (FTCs) and extension services. - Households/Individuals: The technology was adopted by individual rural smallholder farmers.	Individuals or households||| Civil Society- sub-national or local||| Local government||| National government	|||	0		1
6714507	Stake-holders: Government (sub-national)	Civil Society- sub-national or local||| Sub-national government||| Local government	the study looks at the efforts by subnational governments (states)|||State government|||	0		1
6714508	Stake-holders: - Government (sub-national): Planned intervention, viz., in the form of construction of water harvesting structure, should be initiated by the State Government. - Government (local): Support received from Village Science Centre... positively influenced the farmers to adapt to climate change. - Civil society (sub-national or local): The local church committee is involved in fixing w…	National government||| Individuals or households		0	1
6714510	Stake-holders: - Government (local) - Civil society (national) - Individuals or households	Individuals or households||| National government||| Civil Society- international/multinational/national||| Civil Society- sub-national or local||| Local government		1
6714511	Stake-holders: - Government (sub-national): Department of Agriculture, Kathmandu, Nepal - Civil society (national): Green Governance Nepal - Individuals or households: Local farmers in Udayapur District	Individuals or households||| Civil Society- international/multinational/national||| Civil Society- sub-national or local		0	1
6714512	Stakeholders: - Individuals or households	Individuals or households	|||	1
6714513	Stake-holders: Government (national), Private sector (corporations), Civil society (national), Individuals or households	Individuals or households		0	1
6714514	Stake-holders: - Government (national): The Government of Bangladesh (GoB) - Government (sub-national): Local governing bodies in riverine areas - Civil society (sub-national or local): Community-level organizations - Individuals or households: Rural households, including large, medium, small, and landless farmers	Individuals or households	|||	0	1
6714515	Stake-holders: - Government (national): Rwanda Agricultural Board (RAB) - Government (local): Local Government - Individuals or households: Farmers using plant clinics	National government||| Private sector SMEs||| Individuals or households	|||	0		1
6714516	Stake-holders: - Individuals or households - Government (sub-national) - Civil society (sub-national or local)	Individuals or households	Private forest owners|||	0	1
6714517	Stake-holders: - Government (sub-national) - Government (local) - Individuals or households	Individuals or households||| Sub-national government||| Other	|||Agricultural extension agents considered other/sub-national government	1
6714519	Stake-holders: - Individuals or households: The primary stakeholders involved are the paddy farmers of Rasht County. - Government (local): There is a role of local agricultural organizations and agricultural experts who validate and aid in the dissemination of information and measures.	Individuals or households	|||	0	1
6714520	Stake-holders: - Individuals or households: Farmers - Government (local): Agricultural departments - Government (sub-national): Assam state government	Individuals or households		0	1
6714521	Stake-holders: - Individuals or households - Other - Local community (farmers themselves)	Individuals or households||| National government||| Civil Society- sub-national or local||| Local government		0		1
6714523	Stake-holders: - Government (local) - Individuals or households	Individuals or households	|||	0	1
6714525	Stake-holders: ['Individuals or Households']	Individuals or households	|||	1
6714526	Stake-holders: - Individuals or households - Government (national) - Government (sub-national) - Civil society (national)	Individuals or households	|||	0	1
6714527	Stake-holders: - Individuals or households - Government (local) - Civil society (sub-national or local) - Civil society (international, multinational, national) - Government (national)	Individuals or households	|||	0	1
6714528	Stake-holders: Individuals or households, Civil society (sub-national or local), Government (local)	Individuals or households||| Other||| Sub-national government||| National government	Traditional knowledge holders|||community elders, government officials|||elder	0	1
				113

## Sheet: responses
file	base_response	extraction_response	country	sub_region	depth	stake_holders	Article.ID	Summarize	1.1.Geography	1.1.1.Geography-Country	1.2.Sector	1.3.Cross.cutting.topics	1.4.Indigenous.knowledge	1.5.Local.knowledge	2.1.1.Actors.Institutions	2.1.2.Actors-Other	2.1.3.Actors-QUOTES	2.2.1.Equity-Planning	2.2.2.Equity-PlanOther	2.2.3.Equity-PlanQUOTES	2.3.1.Equity-Targeting	2.3.2.Equity-TarOther	2.3.3.Equity-TarQUOTES	3.1.1.ResponseType	3.1.2.Response-QUOTES	3.2.1.Implementation.tools	3.2.2.ImpTools-QUOTES	3.3.1.Hazards	3.3.2.Hazards-Other	3.3.3.Hazards-QUOTES	3.4.1.Exposure.vulnerability	3.4.2.Exposure-Other	3.4.3.Exposure-QUOTES	3.5.1.Link.to.risks	3.5.2.Links-QUOTES	Implementation widespread.Vulnerability assessment and/or early planning.Vulnerability assessment and/or early planning.Implementation	4.1.2.Implement-QUOTES	4.2.Finance	4.3.Costs	DEPTH SCORE	4.4.1.Depth	4.4.2.Depth-QUOTES	SCOPE SCORE	4.5.1.Scope	4.5.2.Scope-QUOTES	SPEED SCORE	4.6.1.Speed	4.6.2.Speed-QUOTES	5.1.1.Reduced.risk
6714470	### Question 1: Geographic Location of Adaptation Responses **Location 1:** - **Country name:** Ghana - **Sub-national region:** Northern Region, West Mamprusi District, Wungu and Gbeduri villages - **Excerpt:** "The study for this paper took place in six villages (Nyangua, Pungu-Bavugnia, Wungu, Gbeduri, Nyoglo, and Kanshegu) located in three districts (Savelugu Nanton, West Mamprusi, and Kassen…	1. Country: Ghana 2. Sub-national region: - Northern Region, West Mamprusi District, Wungu and Gbeduri villages - Upper East Region, Kassena Nankana East District, Nyangua and Pungu-Bavugnia villages - Northern Region, Savelugu Nanton District, Nyoglo and Kanshegu villages 3. Stake-holders: - Intensification of Irrigation: - Individuals or households - Integration of Livestock Production: - Indiv…	Ghana			Stake-holders: - Intensification of Irrigation: - Individuals or households - Integration of Livestock Production: - Individuals or households - Changes in Tillage Practices: - Individuals or households - Application of Fertiliser and Other Inputs on Farms: - Individuals or households - Shift from Agriculture to Non-Farm Jobs: - Individuals or households - Seasonal Migration: - Individuals or hou…	6714470	An interesting study exploring autonomous and planned adaptation responses to climate change in Northern Ghana, with discussion of barriers, proactive/reactive responses and government involvement in implementation.|||The paper assesses the adoption of adaptation strategies in northern Ghana as a result of climate change and variability. The results indicate that the relativity in adoption and ut…	Africa	Ghana|||Savelugu Nanton, West Mamprusi and Kassena Nankana East Districts (Ghana)	Food fibre & other ecosystem products||| Poverty livelihoods & sustainable development	Deserts/semi-arid areas/desertification	TRUE	TRUE	Individuals or households||| Local government||| Civil Society- sub-national or local||| National government	traditional chief|||Experts (planning ofÃƒÂ¯Ã‚Â¬Ã‚Âcers at the districts)|||	"A total of 530 respondents took part in the survey" "The experts' interviews were conducted with the planning officersat the districts, to ascertain their roles in enhancing or constraining the adaptive capacities ofvillages. Other experts interviewed were the non-governmental organisations (NGOs)."|||"An eclectic mix of participatory qualitative assessments and quantitative research methods was…	Women||| Elderly||| Low-income		"These were the men focus group, comprising the traditional chief and ordinary men of all ages" "In order to tease out the composite per-spectives of the factors influencing the relative adoption of the different adaptive strategies,the male and female focus groups in each village were brought together for this exercise." "Based on the villages' own wealth ranking, respondents ineach gender categ…	Low-income	Experts (planning ofÃƒÂ¯Ã‚Â¬Ã‚Âcers at the districts)|||	"Ninety respondents were tar- geted in each village [...]"|||heterogeneity in adoption of different response strategies based on different of socio-economic statuses of individuals	Behavioural/cultural||| Technological/infrastructural||| Institutional	Autonomous and planned responses|||" [...] introduction of non-traditional crop varieties such as cow pea and white maize with short gestation periods; and the rehabilitation and expansion of existing irrigation facilities"|||"rrigation is considered as one of the most effective responses to crops production in the midst of erratic weather conditions. "|||"An important activity for us women is th…	Irrigation, integration and intensification of livestock rearing into crop production, changes in tillage practices, application of fertiliser and other inputs on farms, shift from agriculture to non-farm jobs, seasonal emigration, drought insurance for maize|||mass media|||extension service|||autonomous adaptations by households or individuals	"Irrigation is considered as one of the most effective responses to crops production in the midst of erratic weather conditions" " Importantly, the introduction of early maturing white maize as noted in the fourth section above is one of the planned adaptation strategies to climate change intro-duced by the Government through the Ministry of Agriculture" "The application of fertiliser on cropped …	Increased frequency and intensity of extreme heat||| Drought||| Precipitation variability||| General climate impacts	"increased in temperature "|||"a decrease in rainfall"|||	"The months of April, May and June, and geographically the northern savannah zone, experienced the most rapid temp-erature increase, around 0.278C per decade. Future projections for the country show that temperatures will change by 0.68C, 2.08C and 3.98C in 2020, 2050 and 2080, respectively(Environmental Protection Agency (EPA)2011 ). And, notwithstanding the uncertainty in the amount and distrib…	Poverty||| Food security		"Being characterised largely by agrarianism and primary extraction, the effects of climate change weigh very heavily on the poor in Ghana and many African countries, especially in the rural areas (Laubeet al. 2012, Rodima-Tayloret al. 2012). Unequivocally, poor people in the rural areas have high dependency on natural resources for their livelihoods, hence the emergence of any adverse effects on …	Reducing risk of impact on livelihood, diversifying crops, supporting agricultural sector.|||Authors assumed that the use of fertiliser on cropped lands instead of animal manure could help to adapt to the declining soil fertility occasioned by over-cultivation, climate change and human factors necessitate the adoption of this strategy|||support sources of livelihood, predominantly agriculture	"The application of fertiliser on cropped lands instead of animal manure is among the many autonomous adaptive strategies used in the study villages, although with the implementation of the fertiliser subsidy programme in 2008, fertiliser application could be considered a quasiplanned adaptation strategy. As revealed in Table 8, there is an overwhelming move from traditional organic farming pract…	Implementation widespread	Government involvement, evidence of planned adaptation, not just autonomous adaptation.|||The options studied are at different levels of implementation|||evidence from farmers' adoption of intensification of irrigation, changes in tillage practices, application of fertilizer and other input farms, and adoption of index insurance for maize	TRUE	Cost of response	Low	Evidence of depth of responses, in collaboration with a national government programme and NGO involvement.|||Low adoption of irrigation facilities|||Integration and intensiÃƒÂ¯Ã‚Â¬Ã‚Âcation of livestock rearing into crop production is widely used|||limited	"In Ghana, theNational Climate Change Policy (NCCP) (Ministry of Environment, Science, Technologyand Innovation2012) provides the framework for planned adaptation strategies to climatechange. Overall, the NCCP has five priority policy areas: agriculture and food security; dis-aster preparedness and response; natural resource management; equitable social develop-ment; energy, industrial; and infra…	Low	Broader scope, engagement with planned and autonomous adaptation, evidence of uptake.|||The research was limited to a specific region of Ghana, and can be referred as local initiatives|||small	"he key interest of this paper is to gain an understanding on the processes and drivers propelling the adoption of the different autonomous adaptation strategies in the six villages in the rural northern savannah zone of Ghana and how they could shape future planned adaptation strategies."|||"The study for this paper took place in six villages (Nyangua, Pungu-Bavugnia, Wungu, Gbeduri, Nyoglo and …	Not certain / Insufficient information / Not assessed	Faster. Evidence of reactive and proactive responses.|||Not reported|||slow	Discussion of reactive and proactive responses.|||behavioral changes. Insurance program didn't show impact and product was discontinued	1
[truncated: 24 more columns]

## Sheet: ExpertLevel3_Depth
file	depth	DEPTH SCORE	Resolve_EL3
6205524	Medium	Low	0
6205525	Medium	Low	0
6205526	Medium	Low	0
6205528	Low	Not certain / Insufficient information / Not assessed	0
6216010	Medium	Low	0
6216012	Medium	Low	0
6216013	Medium	Low	0
6216014	Low	Low	1
6216015	Medium	Medium	1
6216017	Medium	Medium	1
6216019	Medium	Low	0
6216022	Medium	Low	0
6216024	Medium	Low	0
6216026	Medium	Low	0
6216028	Medium	Low	0
6216030	Medium	Low	0
6714220		Low	0
6714222		Low	0
6714223	Medium	Low	0
6714224	Medium	Low	0
6714225	Medium	Low	0
6714226	Medium	Low	0
6714227	Medium	Low	0
6714228	Medium	Medium	1
6714232	Medium	Not certain / Insufficient information / Not assessed	0
6714233	Medium	Low	0
6714234	Medium	Low	0
6714235		Low	0
6714238		Low	0
6714593		Low	0
6714594	Medium	Medium	1
6714596	Medium	Low	0
6714598	Medium	Low	0
6714599	Medium	Medium	1
6714600	Medium	Low	0
6714601	Medium	Low	0
6714602		Low	0
6714603		Low	0
6714604	Medium	Low	0
6714606		Low	0
6714607	Medium	Medium	1
6714611	Medium	Low	0
6714612	Medium	Low	0
6714613	Medium	Low	0
6714614	High	Low	0
6714615	Low	Low	1
6714616	Medium	Low	0
6714617	Medium	Low	0
6714618	Medium	Low	0
6714620	Medium	Medium	1
6714621	Medium	Low	0
6714622	Medium	Low	0
6714623	Medium	Low	0
6714626		Low	0
6714627	Medium	Low	0
6714628	Medium	Low	0
6714629	Low	Not certain / Insufficient information / Not assessed	0
6714630	Medium	Low	0
6714632	Medium	Low	0
6714635	Medium	Low	0
6714636	Medium	Low	0
6714637	Medium	Medium	1
6714638	Medium	Low	0
6714639	Medium	Low	0
6714640	Medium	Low	0
6714642	Medium	Low	0
6714643	Medium	Medium	1
6714644	Medium	Not certain / Insufficient information / Not assessed	0
6714646	Medium	Low	0
6714647	Medium	Not certain / Insufficient information / Not assessed	0
6714650	Medium	Low	0
6714652	Medium	Not certain / Insufficient information / Not assessed	0
6714653	Medium	Low	0
6714654	Medium	Medium	1
6714655	Medium	Medium	1
6714703	Medium	Medium	1
6714704	Medium	Low	0
6714705	Medium	Low	0
6714707	Medium	Low	0
6714709	Medium	Not certain / Insufficient information / Not assessed	0
6714811		Not certain / Insufficient information / Not assessed	0
6714813	Medium	High	0
6714817	Medium	Not certain / Insufficient information / Not assessed	0
6714819	Medium	Medium	1
6714820	Medium	Low	0
6714571		Low	0
6714573	Medium	Medium	1
6714574	Medium	Low	0
6714575	Medium	Low	0
6714577	Medium	Low	0
6714578	Medium	Medium	1
6714579	Medium	Low	0
6714580		Low	0
6714581	Medium	Low	0
6714582	Medium	Low	0
6714585	Low	Medium	0
6714586	Medium	Low	0
6714587	Low	Low	1
6714588	Medium	Low	0
6714590	Medium	Medium	1
6714592	Medium	Low	0
7851117		Medium	0
7851118		Medium	0
7851127	Medium	Low	0
7851128	Medium	Low	0
7851132	Medium	Low	0
7851134	Medium	Medium	1
7851142	Medium	Low	0
7851155		Low	0
7851158	Medium	Low	0
7851161	Medium	Low	0
7851163	Medium	Low	0
7851165	Medium	Low	0
7851166	Medium	Medium	1
7851169	Medium	Not certain / Insufficient information / Not assessed	0
6714240	Medium	Low	0
6714241	Medium	Low	0
6714242	Medium	Low	0
6714243	Medium	Medium	1
6714245	Medium	Low	0
6714246	Medium	Low	0
6714247	Medium	Medium	1
6714248		Low	0
6714249	Medium	Low	0
6714250	Medium	Medium	1
6714251	Medium	Low	0
6714252	Medium	Not certain / Insufficient information / Not assessed	0
6714253		Low	0
6714254	Low	Low	1
6714255	Medium	Low	0
6714256	Medium	Low	0
6714259	Medium	Low	0
6714260		Low	0
6714261	Medium	Low	0
6714263	Medium	Low	0
6714264	Medium	Low	0
6714267	Medium	Low	0
6714268	Medium	Low	0
6714269	Medium	Low	0
6714605		Low	0
6714641	Medium	Low	0
6714657		Medium	0
6714658	Medium	Medium	1
6714659	Medium	Low	0
6714660	Medium	Low	0
6714661	Medium	Low	0
6714664	Medium	Low	0
6714665		Low	0
6714666	Medium	Low	0
6714667	Medium	Medium	1
6714670	Medium	Low	0
6714671	Medium	Low	0
6714673	Medium	Low	0
6714674	Medium	Medium	1
6714677	Medium	Low	0
6714679		Low	0
6714680	Medium	Low	0
6714682	Medium	Medium	1
6714683	Medium	Low	0
6714684	Medium	Low	0
6714686	Medium	Medium	1
6714687	Medium	Low	0
6714688		Low	0
6714689	Medium	Low	0
6714690	Medium	Low	0
6714692	Medium	Low	0
6714695	Medium	Low	0
6714696		Low	0
6714697	Medium	Low	0
6714698	Medium	Low	0
6714699		Low	0
6714701	High	Not certain / Insufficient information / Not assessed	0
6714702	Medium	Low	0
6216006	Medium	Low	0
6714270	Medium	Low	0
6714271	Low	Medium	0
6714272	Low	Low	1
6714273	Medium	Low	0
6714274	Medium	Low	0
6714275	Medium	Low	0
6714276	Medium	Low	0
6714277	Medium	Low	0
6714278	Medium	Low	0
6714279	Medium	Low	0
6714281	Medium	Low	0
6714283	Medium	Low	0
6714284		Medium	0
6714285	Medium	Low	0
6714287	Medium	Low	0
6714288	Medium	Low	0
6714289	Medium	Medium	1
6714290	Medium	Low	0
6714291	Medium	Low	0
6714292	Medium	Medium	1
6714293	Medium	Low	0
6714294	Medium	Low	0
6714295		Low	0
6714296	Medium	Low	0
6714706	Medium	Medium	1
6714711	Medium	Low	0
6714712	Medium	Medium	1
6714713	Low	Not certain / Insufficient information / Not assessed	0
6714714	Low	Not certain / Insufficient information / Not assessed	0
6714716	Medium	Low	0
6714718	Medium	Low	0
6714720	Medium	Low	0
6714721	Medium	Low	0
6714722		Low	0
6714723	Low	Low	1
6714724	Medium	Low	0
6714727	Medium	Not certain / Insufficient information / Not assessed	0
6714728	Medium	Not certain / Insufficient information / Not assessed	0
6714731	Medium	Low	0
6714732	Medium	Medium	1
6714733	Medium	Medium	1
6714734		Low	0
6714736	Medium	Not certain / Insufficient information / Not assessed	0
6714737	Medium	Low	0
6714738	Medium	Not certain / Insufficient information / Not assessed	0
6714739	Medium	Medium	1
6714740	Low	Low	1
6714744	Medium	Medium	1
6714746	Medium	Medium	1
6714747	Low	Not certain / Insufficient information / Not assessed	0
6714749		Medium	0
6714752	Medium	Medium	1
6714756	Medium	Low	0
6714757	Low	Low	1
6714758	Medium	Not certain / Insufficient information / Not assessed	0
6714760	Low	Low	1
6714761	Medium	Not certain / Insufficient information / Not assessed	0
6714763	Medium	Not certain / Insufficient information / Not assessed	0
6714764	Medium	Medium	1
6714767	Medium	Not certain / Insufficient information / Not assessed	0
6714769	Medium	Low	0
6714771	Medium	Low	0
6714297	Low	Low	1
6714298	Medium	Low	0
6714299	Medium	Low	0
6714300	Medium	Low	0
6714301	Medium	Low	0
6714302	Medium	Low	0
6714303	Medium	Low	0
6714304	Low	Medium	0
6714305		Low	0
6714307	Medium	Low	0
6714309	Medium	Low	0
6714310	Medium	Low	0
6714311	Medium	Medium	1
6714312	Medium	Low	0
6714313	Medium	Low	0
6714314	Medium	Medium	1
6714315	Medium	Low	0
6714316	Medium	Low	0
6714317	Medium	Low	0
6714318	Medium	Low	0
6714319	Low	Low	1
6714320	Low	Low	1
6714321	Medium	Not certain / Insufficient information / Not assessed	0
6714322	Medium	Low	0
6714323	Medium	Low	0
6714324	Medium	Low	0
6714325	Medium	Low	0
6714327	Medium	Medium	1
6714609		Low	0
6714743	Medium	Medium	1
6714748	Medium	Medium	1
6714755	Not certain / Insufficient information / Not assessed	Low	0
6714774	Medium	Low	0
6714775	Low	Low	1
6714776	Medium	Not certain / Insufficient information / Not assessed	0
6714777	Medium	Not certain / Insufficient information / Not assessed	0
6714778	Medium	Medium	1
6714779	Medium	Low	0
6714781	Low	Low	1
6714782	Medium	Not certain / Insufficient information / Not assessed	0
6714783		Not certain / Insufficient information / Not assessed	0
6714785	Medium	Low	0
6714786		Low	0
6714787	Medium	Low	0
6714789	Medium	Low	0
6714790	Medium	Low	0
6714791	Medium	Medium	1
6714792	Medium	Low	0
6714793	Medium	Low	0
6714796	Medium	Low	0
6714797		Low	0
6714800	Medium	Low	0
6714801	Medium	Low	0
6714802	Medium	Low	0
6714804	Medium	Medium	1
6714805	Medium	Low	0
6714806	Medium	Medium	1
6714807	Medium	Not certain / Insufficient information / Not assessed	0
6714808	Medium	Medium	1
6714809	Low	Low	1
6714810	Medium	Low	0
6714329	Medium	Low	0
6714330	Medium	Medium	1
6714331	Medium	Low	0
6714332	Medium	Not certain / Insufficient information / Not assessed	0
6714334	Medium	Low	0
6714336	Medium	Low	0
6714337	Medium	Low	0
6714338	Medium	Medium	1
6714340	Medium	Low	0
6714341	Medium	Low	0
6714342	Medium	Low	0
6714344	Medium	Low	0
6714346	Medium	Not certain / Insufficient information / Not assessed	0
6714347	Medium	Low	0
6714348	Medium	Low	0
6714352	Medium	Low	0
6714353	Medium	Low	0
6714354	Medium	Low	0
6714355	Medium	Not certain / Insufficient information / Not assessed	0
6714357	Medium	Low	0
6714816	Medium	Medium	1
6714822	Medium	Medium	1
6714823	Medium	Low	0
6714824	Medium	Low	0
6714825	Medium	Medium	1
6714826	Medium	Medium	1
6714828	Medium	Not certain / Insufficient information / Not assessed	0
6714829	Medium	Medium	1
6714830	Medium	Not certain / Insufficient information / Not assessed	0
6714831		Low	0
6714832	Medium	Not certain / Insufficient information / Not assessed	0
6714836	Low	Low	1
6714837	Medium	Not certain / Insufficient information / Not assessed	0
6714838	Medium	Low	0
6714839	Medium	Low	0
6714841		Not certain / Insufficient information / Not assessed	0
6714842	Medium	Low	0
6714843	Medium	Medium	1
6714844	Medium	Low	0
6714848		Low	0
6714850	Medium	Not certain / Insufficient information / Not assessed	0
6714851	Medium	Low	0
6714854	Medium	Low	0
6714855	Medium	Low	0
6715346		Low	0
6715347	Medium	Low	0
6715349	Medium	Low	0
6715350	Medium	Not certain / Insufficient information / Not assessed	0
7851049	Medium	Low	0
7851053	Medium	Medium	1
7851057	Medium	Low	0
7851058	Medium	Not certain / Insufficient information / Not assessed	0
7851061	Medium	High	0
7851062	Low	Low	1
7851065	Medium	Not certain / Insufficient information / Not assessed	0
7851066	Medium	Medium	1
6714345		Low	0
6714360	Medium	Low	0
6714361		Not certain / Insufficient information / Not assessed	0
6714362	Medium	Low	0
6714363	Medium	Low	0
6714366	High	High	1
6714368	Medium	Low	0
6714370	Low	Low	1
6714371	Low	Low	1
6714372	Low	Low	1
6714373	Low	Low	1
6714374	Medium	Medium	1
6714375	Medium	Low	0
6714376	Medium	Low	0
6714377	Medium	Low	0
6714378	Medium	Low	0
6714379	Low	Low	1
6714380	Medium	Medium	1
6714384	Medium	Low	0
6714385	Medium	Low	0
6714386		Medium	0
6714387	Medium	Low	0
6714388	Medium	Low	0
6714389	Medium	Low	0
6714390	Medium	Not certain / Insufficient information / Not assessed	0
6714391	Medium	Medium	1
6714392	Medium	Low	0
6714393	Medium	Medium	1
6714394	Medium	Medium	1
6714397	Medium	Medium	1
6714398	Medium	Low	0
6714399	Medium	Low	0
6714400	Medium	Low	0
6714401		Not certain / Insufficient information / Not assessed	0
6714402	Medium	Low	0
6714403	Medium	Low	0
6714404	Medium	Low	0
6714405	Medium	Low	0
6714406	Medium	Low	0
6714408	Medium	Medium	1
7851073	Medium	Low	0
7851074	Medium	Low	0
7851075	Medium	Low	0
7851076	Medium	Low	0
7851080	Medium	Low	0
7851081	Medium	Medium	1
7851083	Medium	Low	0
7851084	Medium	Low	0
7851085	Medium	Medium	1
7851088	Medium	Low	0
7851090		Not certain / Insufficient information / Not assessed	0
7851091	Medium	Low	0
7851092	Low	Medium	0
7851094	Medium	Not certain / Insufficient information / Not assessed	0
7851098	Medium	Low	0
7851099		Low	0
7851102	Medium	Low	0
7851103	Medium	Low	0
7851104	Medium	Medium	1
7851105	Medium	High	0
7851107	Medium	Low	0
7851109	Medium	Low	0
7851112	Medium	Medium	1
7851115	Medium	Low	0
6714409	Medium	Low	0
6714411	Medium	Not certain / Insufficient information / Not assessed	0
6714412	Medium	Low	0
6714413	Medium	Low	0
6714414	Medium	Low	0
6714415	Medium	Low	0
6714417	Medium	Low	0
6714418	Medium	Low	0
6714420	Medium	Medium	1
6714421	Medium	Medium	1
6714422	Medium	Low	0
6714423	Medium	Low	0
6714424	Medium	Low	0
6714425	Medium	Medium	1
6714426	Medium	Low	0
6714427	Medium	Not certain / Insufficient information / Not assessed	0
6714428	Medium	Low	0
6714429	Medium	Low	0
6714432	Medium	Low	0
6714433	Medium	Low	0
6714434	Medium	Low	0
6714435	Medium	Low	0
6714436	Medium	Low	0
6714439	Medium	Low	0
6714443	Not certain / Insufficient information / Not assessed	Low	0
6714445	Medium	Low	0
6714447	Low	Low	1
6714448	Medium	Low	0
6714449		Low	0
6714451	Medium	Low	0
6714529	Medium	Low	0
6714531	Medium	Low	0
6714533		Low	0
6714536		Medium	0
6714537	Medium	Low	0
6714539	Medium	Low	0
6714540	Medium	Low	0
6714541	Medium	Low	0
6714542	Medium	Low	0
6714544	Medium	Low	0
6714545	Medium	Low	0
6714546	Medium	Low	0
6714549	Medium	Low	0
6714551	Medium	Not certain / Insufficient information / Not assessed	0
6714553	Medium	Low	0
6714554	Medium	Not certain / Insufficient information / Not assessed	0
6714555	Medium	Low	0
6714556	Medium	Low	0
6714557	Medium	Low	0
6714558	Medium	Not certain / Insufficient information / Not assessed	0
6714559		Low	0
6714561	Medium	Low	0
6714564	Medium	Medium	1
6714565	Medium	Low	0
7851139	Medium	Not certain / Insufficient information / Not assessed	0
7851141	Medium	Low	0
7851149	Medium	Low	0
7851150	Medium	Not certain / Insufficient information / Not assessed	0
7851151	Medium	Medium	1
7851153	Medium	Low	0
7851156	Medium	Low	0
7851157	Medium	Medium	1
6714409	Medium	Low	0
6714411	Medium	Not certain / Insufficient information / Not assessed	0
6714412	Medium	Low	0
6714413	Medium	Low	0
6714414	Medium	Low	0
6714415	Medium	Low	0
6714417	Medium	Low	0
6714418	Medium	Low	0
6714420	Medium	Medium	1
6714421	Medium	Medium	1
6714422	Medium	Low	0
6714423	Low	Low	1
6714424	Low	Low	1
6714425	Medium	Medium	1
6714426	Medium	Low	0
6714427	Medium	Not certain / Insufficient information / Not assessed	0
6714428	Medium	Low	0
6714429	Medium	Low	0
6714432	Medium	Low	0
6714433	Medium	Low	0
6714434	Medium	Low	0
6714435	Medium	Low	0
6714436		Low	0
6714439	Medium	Low	0
6714443	Not certain / Insufficient information / Not assessed	Low	0
6714445	Medium	Low	0
6714447	Medium	Low	0
6714448	Medium	Low	0
6714449	Medium	Low	0
6714451	Medium	Low	0
6714529	Medium	Low	0
6714531	Medium	Low	0
6714533	Medium	Low	0
6714536	Medium	Medium	1
6714537	Medium	Low	0
6714550		Low	0
6714567	Medium	Low	0
6714568	Low	Low	1
6714569	Medium	Low	0
6714416		Medium	0
6714437	Medium	Low	0
6714438	Medium	Medium	1
6714440	Medium	Low	0
6714441	Medium	Low	0
6714452		Not certain / Insufficient information / Not assessed	0
6714453	Medium	Medium	1
6714454		Low	0
6714455	Medium	Low	0
6714456	High	Medium	0
6714458	Medium	Not certain / Insufficient information / Not assessed	0
6714459	Medium	Not certain / Insufficient information / Not assessed	0
6714460	Medium	Low	0
6714461	Medium	Low	0
6714463	Medium	Low	0
6714464	Medium	Medium	1
6714465	Medium	Medium	1
6714466	Medium	Low	0
6714469	Medium	Low	0
6714470		Low	0
6714471	Medium	Medium	1
6714472	Medium	Not certain / Insufficient information / Not assessed	0
6714474	Medium	Low	0
6714475	Medium	Low	0
6714477	Medium	Low	0
6714478	Medium	Medium	1
6714479	Medium	Low	0
6714480	Medium	Low	0
6714481	Medium	Low	0
6714482	Medium	Low	0
6714483	Medium	Low	0
6714484	Medium	Low	0
6714485	Low	Low	1
6714486	Low	Low	1
6714487	Low	Low	1
6714489	Medium	Low	0
6714490	Medium	Low	0
6714491		Low	0
6714492	Medium	Medium	1
6714494	Medium	Low	0
6714497		Low	0
6714498	Medium	Not certain / Insufficient information / Not assessed	0
6714530	Medium	Low	0
6714499	Medium	Low	0
6714500	Medium	Low	0
6714501	Medium	Low	0
6714503	Medium	Low	0
6714504		Not certain / Insufficient information / Not assessed	0
6714505		Low	0
6714506	Medium	Medium	1
6714507	Medium	Low	0
6714508	Medium	Low	0
6714510	Medium	Medium	1
6714511	Medium	High	0
6714512		Low	0
6714513		Low	0
6714514	Medium	Low	0
6714515	Medium	Low	0
6714516	Low	Low	1
6714517	Medium	Low	0
6714519	Medium	Low	0
6714520	Medium	Low	0
6714521	Medium	Low	0
6714523	Medium	Low	0
6714525	Medium	Low	0
6714526	Medium	Low	0
6714527	Medium	Not certain / Insufficient information / Not assessed	0
6714528	Medium	Low	0
